# Supplementary material
Source: MDPI journal article supplement (https://www.mdpi.com/2218-6581/10/1/16)
Supplement: s1 [file s1]

Archive with 3 entries (3 files):
- Technical Report S1 Bioloids, multiplication TechRep.pdf
- Audio S1 Bioloids, audio files.zip
- Software S1 Bioloids, code.docx
