# Supplementary material
Source: MDPI journal article supplement (https://www.mdpi.com/2218-6581/10/1/16)
Supplement: s1 [file s1 › Technical Report S1 Bioloids, multiplication TechRep.pdf]

# Bioloids Teach Multiplications

## (Technical Report)

HUANG Ivy S.  
HOORN Johan F.

### Contents

|                                                                                                      |    |
|------------------------------------------------------------------------------------------------------|----|
| Objectives .....                                                                                     | 2  |
| Variables .....                                                                                      | 2  |
| 1. Summary of variables .....                                                                        | 2  |
| 2. Participants .....                                                                                | 4  |
| 3. Participant distribution .....                                                                    | 4  |
| 4. Questionnaire overview .....                                                                      | 5  |
| 5. Data Analysis in Brief .....                                                                      | 5  |
| 6. Data Analysis Extended.....                                                                       | 11 |
| 7. Effect of Age, School, Gender, and Novelty on Baseline and FinMSco.....                           | 11 |
| 7.1. Outlier Analysis on Baseline - find the extreme values .....                                    | 11 |
| 7.2. Two-tailed Correlation Between Baseline-Age and FinMSco-Age* .....                              | 12 |
| 7.3. Two-tailed Correlation Between Novelty and Fin_min_Base .....                                   | 12 |
| 7.4. Two-tailed Independent Samples T-test of School on Baseline.....                                | 12 |
| 7.5. Two-tailed Independent Samples T-test of Gender on Baseline .....                               | 13 |
| 7.6. School (2) $\times$ Gender (2) ANOVA on Baseline with Age as covariate.....                     | 13 |
| 7.7. School (2) $\times$ Gender (2) ANOVA on FinMSco with Age as covariate.....                      | 14 |
| 7.8. Conclusion.....                                                                                 | 15 |
| 8. Effect of School, Robot Design, and Gender on Fin_min_Base .....                                  | 15 |
| 8.1. Fin_min_Base calculation .....                                                                  | 15 |
| 8.2. School (2) $\times$ Robot (2) $\times$ Gender (2) ANOVA on Fin_min_Base with Age as covariate.. | 15 |
| 8.3. Two-tailed Independent Samples T-test of School and Robot Design on Fin_min_Base .              | 16 |
| 8.4. Paired Samples T-test on Baseline and FinMSco* .....                                            | 17 |
| 8.5. Conclusion.....                                                                                 | 18 |
| 9. Effects of Advancement and Partake on Fin_min_Base .....                                          | 18 |
| 9.1. Advancement calculation .....                                                                   | 18 |
| 9.2. Inspection of the students who learned worse .....                                              | 18 |
| 9.3. One-way ANOVA of Partake on Fin_min_Base .....                                                  | 19 |
| 9.4. One-way ANOVA of Advancement on Fin_min_Base .....                                              | 19 |
| 9.5. Partake (3) $\times$ Advancement (4) ANOVA on Fin_min_Base with Age as covariate.....           | 20 |
| 9.6. Paired Samples T-test of Partake on Baseline and FinMSco* .....                                 | 20 |
| 9.7. Per_Fin_min_Base calculation.....                                                               | 22 |
| 9.8. Correlations of Baseline / Partake / Baseline & Partake on Per_Fin_min_Base*.....               | 22 |
| 9.9. One-way ANOVA of Advancement on Per_Fin_min_Base.....                                           | 23 |

|       |                                                                                                                                                                                        |    |
|-------|----------------------------------------------------------------------------------------------------------------------------------------------------------------------------------------|----|
| 9.10. | Two-tailed Independent T-tests of Advancement on Per_Fin_min_Base.....                                                                                                                 | 24 |
| 9.11. | Conclusion.....                                                                                                                                                                        | 26 |
| 10.   | Effects of Robot Design, Representation, and Social Role .....                                                                                                                         | 26 |
| 10.1. | MANOVA of Robot Design (3) on Human-like, Animal-like, and Machine-like*.....                                                                                                          | 26 |
| 10.2. | Two-tailed Independent T-tests of Robot on Human-like and Animal-likeness* .....                                                                                                       | 27 |
| 10.3. | Regression of Human-like, Animal-like, and Machine-like on Fin_min_Base / Per_Fin_min_Base .....                                                                                       | 28 |
| 10.4. | MANOVA of Social Role on Human-like, Animal-like, and Machine-like, separately* 29                                                                                                     |    |
| 10.5. | Conclusion.....                                                                                                                                                                        | 31 |
| 11.   | Reliability Analysis of Questionnaire Items (# = 43) .....                                                                                                                             | 31 |
| 11.1. | Recoding Counter-indicative Items.....                                                                                                                                                 | 31 |
| 11.2. | Convergent Validity .....                                                                                                                                                              | 31 |
| 11.3. | Divergent Validity: PCA .....                                                                                                                                                          | 36 |
| 11.4. | GLM Repeated Measures of Robot Design $\times$ Advancement with Mbond as covar .....                                                                                                   | 39 |
| 11.5. | ANOVA School (2) $\times$ Robot Design (3) $\times$ Gender (2) $\times$ Advancement (4) on Mbond*.....                                                                                 | 40 |
| 11.6. | Independent Samples T-test of School on Mbond * .....                                                                                                                                  | 41 |
| 11.7. | Independent Samples T-test of Partake on Mbond *.....                                                                                                                                  | 42 |
| 11.8. | Correlation between Mbond and Fin_min_Base and with Per_Fin_min_Base .....                                                                                                             | 43 |
| 11.9. | Conclusion.....                                                                                                                                                                        | 43 |
| 12.   | Overview of the factors on Fin_min_Base and Mbond.....                                                                                                                                 | 44 |
| 12.1. | MANOVA of School (2) $\times$ Robot (3) $\times$ Gender (2) $\times$ Advancement (4) on Fin_min_Base, Per_Fin_min_Base, and Mbond with Age, Novelty, and Aesthetics as covariates..... | 44 |
| 13.   | Questionnaire.....                                                                                                                                                                     | 48 |
|       | References.....                                                                                                                                                                        | 52 |

\* Significant effects

## Objectives

We conducted an experiment with different designs of social robots, rehearsing the multiplication tables with primary school children in Hong Kong. We analyzed the effects of School (2) / Partake (3)  $\times$  Robot Design (3)  $\times$  Gender (2)  $\times$  Advancement (4) on

- (a) learning gain, and
- (b) experience of a robot tutor

## Variables

Before analysis, we list all the variables and explain the items on the questionnaire. Where in this report Partake is mentioned, in the paper the name Sessions is used.

### 1. Summary of variables

| Variable | Values                              | Label                                                          | Measure |
|----------|-------------------------------------|----------------------------------------------------------------|---------|
| School   | 1 = "GoodShepherd"<br>2 = "ChunLei" | S.K.H. Good Shepherd Primary School, Hong Kong SAR             | Nominal |
|          |                                     | Free Methodist Bradbury Chun Lei Primary School, Hong Kong SAR |         |

|                             |                                                                                                                                        |                                                                                                                                                                                       |         |
|-----------------------------|----------------------------------------------------------------------------------------------------------------------------------------|---------------------------------------------------------------------------------------------------------------------------------------------------------------------------------------|---------|
| Robot                       | 1 = “Humanoid”<br>2 = “Puppy”<br>3 = “Droid”                                                                                           | The appearance of the robot tutor                                                                                                                                                     | Nominal |
| Baseline<br>(from pre-test) | [0,147]                                                                                                                                | The scores in the pre-test, which established baseline. Pupils multiplied 1-or-2 digit numbers with 2-digit numbers from the range 1-99, most difficult equation being $23 \times 67$ | Scale   |
| Advancement                 | 1 = “Challenged”<br>2 = “Below average”<br>3 = “Above average”<br>4 = “Advanced”                                                       | Advancement level of pupils, according to baseline.                                                                                                                                   | Ordinal |
| BasePerf                    | 1 = “High”<br>2 = “Medium”<br>3 = “Low”                                                                                                | High and Low are the five maximum outliers and the five minimum outliers detected in a data exploration process. Medium are those who are not outliers.                               | Nominal |
| MuSc1                       | [0, max]                                                                                                                               | Multiplication Score at t1 during interaction                                                                                                                                         | Scale   |
| MuSc2                       | [0, max]                                                                                                                               | Multiplication Score at t2 during interaction                                                                                                                                         | Scale   |
| MuSc3                       | [0, max]                                                                                                                               | Multiplication Score at t3 during interaction                                                                                                                                         | Scale   |
| Partake / Sessions          | [1,2,3]                                                                                                                                | Number of times participant interacted with the robot                                                                                                                                 | Scale   |
| FinMSco<br>(from post-test) | [0,147]                                                                                                                                | Final multiplication score based on multiplying 1-or-2 digit with 2-digit numbers                                                                                                     | Scale   |
| Fin_min_Base                | [0, 147]                                                                                                                               | Difference between pre-test Baseline and post-test Final score. Also calculated as difference-score of FinMSco minus Baseline                                                         | Scale   |
| Per_Fin_min_Base            | [min, max]                                                                                                                             | The percentage of Fin_min_Base compared with Baseline                                                                                                                                 |         |
| Representation              | Human_like = [1,6]<br>Animal_like = [1,6]<br>Machine_like = [1,6]                                                                      | What does the robot look like to the participant?                                                                                                                                     | Nominal |
| Social role                 | Friend = [1,6]<br>Classmate = [1,6]<br>Teacher = [1,6]<br>Acquaintance = [1,6]<br>Stranger = [1,6]<br>Machine = [1,6]<br>Other = [1,6] | What does the robot feel like to the participant?                                                                                                                                     | Nominal |
| Bonding                     | Bon_1...5 = [1,6]                                                                                                                      | How is the social-affective relationship between participant and robot tutor? (Konijn & Hoorn, 2017)                                                                                  | Scale   |
| Mbond                       | [1,6]                                                                                                                                  | The mean value of bonding items: Bon_1...5                                                                                                                                            | Scale   |
| Anthropomorphism            | Anth_1...4 = [1,6]                                                                                                                     | Does participant attribute human traits or emotions to robot tutor? (Konijn & Hoorn, 2017)                                                                                            | Scale   |
| Perceived realism           | Real_1...4 = [1,6]                                                                                                                     | Does robot tutor feel like a real creature or is it a fake? (Paauwe et al., 2015)                                                                                                     | Scale   |
| Perceived relevance         | Rel_1...4 = [1,6]                                                                                                                      | Is robot tutor significant for doing the multiplication exercise? (Konijn & Hoorn, 2017)                                                                                              | Scale   |
| Perceived affordances       | Aff_1...4 = [1,6]                                                                                                                      | What can I do with the robot (in view of the multiplication exercise)? (Konijn & Hoorn, 2017)                                                                                         | Scale   |
| Engagement                  | Eng_1...5 = [1,6]                                                                                                                      | Level of involvement with the robot                                                                                                                                                   | Scale   |
| Use intentions              | Use_Int_1...3 = [1,6]                                                                                                                  | Want to use the robot again?                                                                                                                                                          | Scale   |
| Novelty                     | [1,6]                                                                                                                                  | To what extent is the robot tutor new to the participant?                                                                                                                             | Scale   |
| Aesthetics                  | Aest_1 = [1,6]                                                                                                                         | To what extent is the robot attractive to the participant in terms of appearance?                                                                                                     | Scale   |
| Gender                      | 0 = “Male”<br>1 = “Female”                                                                                                             | The gender of the participant                                                                                                                                                         | Nominal |
| Age                         | [7, 10]                                                                                                                                | The age of the participant                                                                                                                                                            | Scale   |

Table 1. Variable details

## 2. Participants

A total of 95 pupils from two Hong Kong primary schools signed up for the experiment. Eventually 75 students were able to participate in at least one session with the robot and do the pre and post-test ( $N = 75$ ;  $M_{Age} = 8.4$ ,  $SD_{Age} = .82$ , range: 7-10, 44% female, Hongkongers). These 75 participants were randomly distributed over three differently Robot Designs (between-subjects): Humanoid ( $n = 21$ ), Puppy ( $n = 27$ ), and Droid ( $n = 27$ ). A Chi-square test of independence checked for the distribution of Age over robots types but no significant relationship was found ( $\chi^2_{(6)} = 1.76$ ,  $p = .94$ ).

We planned for all pupils to participate in 3 robot tutoring sessions spread over more weeks (within-subjects). Due to the schools' tight time schedules, however, not every pupil could partake in every session. Children from the S.K.H. Good Shepherd Primary School only took one session. This number plus those from the Free Methodist Bradbury Chun Lei Primary School that took but one session, resulted into 48 children participating once. Those who participated twice (13), and thrice (14) were all from Chun Lei. Also see next section.

Boys and girls were distributed over the Robot Designs as follows: Humanoid (15 males, 6 females), Puppy (15 males, 12 females), and Droid (12 males, 15 females). The schools' strict time scheduling caused inconsistencies in the ratios but these unequal distributions did not render a significant interaction effect ( $\chi^2_{(2)} = 3.49$ ,  $p = .174$ ).

To determine the Advancement Level of the pupils, we took the average Baseline score ( $N = 75$ ,  $M = 37.16$ ,  $SD = 12.88$ ) established in the pre-test and categorized the children into four groups. Those who scored lower than one standard deviation below average (Baseline  $\leq 22.28$ ) were categorized as 'Challenged' students ( $n = 11$ ). Those between one negative standard deviation and the average were categorized as 'Below average' ( $22.8 < \text{Baseline} \leq 37.16$ ) ( $n = 34$ ). Those between average and one positive standard deviation were categorized as 'Above average' ( $37.16 < \text{Baseline} \leq 52.04$ ) ( $n = 19$ ), and those beyond one positive standard deviation were categorized as 'Advanced' students (Baseline  $> 52.04$ ) ( $n = 11$ ). Also see next section. No significant effect of unequal distributions was found between Advancement Level and Robot Design ( $\chi^2_{(6)} = 1.73$ ,  $p = .943$ ).

## 3. Participant distribution

| School & Robot<br>Advancement & Gender |        | GoodShepherd + ChunLei |       |       | ChunLei  |         |         |         |         |         | Total |    |
|----------------------------------------|--------|------------------------|-------|-------|----------|---------|---------|---------|---------|---------|-------|----|
|                                        |        | Humanoid               | Puppy | Droid | Humanoid |         | Puppy   |         | Droid   |         |       |    |
|                                        |        |                        |       |       | 2 times  | 3 times | 2 times | 3 times | 2 times | 3 times |       |    |
| Challenged                             | Female | 0                      | 1     | 0     | 1        | 0       | 0       | 1       | 0       | 1       | 4     | 11 |
|                                        |        |                        |       |       | 1        |         | 1       |         | 1       |         |       |    |
|                                        | Male   | 1                      | 2     | 1     | 0        | 1       | 0       | 0       | 1       | 1       | 7     |    |
|                                        |        |                        |       |       | 1        |         | 0       |         | 2       |         |       |    |
| Below Average                          | Female | 1                      | 2     | 6     | 1        | 0       | 1       | 1       | 2       | 0       | 14    | 34 |
|                                        |        |                        |       |       | 1        |         | 2       |         | 2       |         |       |    |
|                                        | Male   | 5                      | 4     | 3     | 1        | 0       | 2       | 2       | 2       | 1       | 20    |    |
|                                        |        |                        |       |       | 1        |         | 4       |         | 3       |         |       |    |
| Above Average                          | Female | 1                      | 2     | 2     | 1        | 0       | 0       | 1       | 0       | 1       | 8     | 19 |
|                                        |        |                        |       |       | 1        |         | 1       |         | 1       |         |       |    |
|                                        | Male   | 4                      | 2     | 1     | 0        | 2       | 0       | 2       | 0       | 0       | 11    |    |
|                                        |        |                        |       |       | 2        |         | 2       |         | 0       |         |       |    |
| Advanced                               | Female | 1                      | 4     | 2     | 0        | 0       | 0       | 0       | 0       | 0       | 7     | 11 |
|                                        |        |                        |       |       | 0        |         | 0       |         | 0       |         |       |    |
|                                        | Male   | 1                      | 0     | 2     | 0        | 0       | 0       | 0       | 1       | 0       | 4     |    |
|                                        |        |                        |       |       | 0        |         | 0       |         | 1       |         |       |    |
| Total                                  |        | 14                     | 17    | 17    | 4        | 3       | 3       | 7       | 6       | 4       | 75    |    |
|                                        |        |                        |       |       | 7        |         | 10      |         | 10      |         |       |    |
|                                        |        | 48                     |       |       | 27       |         |         |         |         |         |       |    |

Table 2. Participant distribution

#### 4. Questionnaire overview

| Index                     | Section               | Description                                                                                          | Number of items | Abbreviation & Value                                                                                                  |
|---------------------------|-----------------------|------------------------------------------------------------------------------------------------------|-----------------|-----------------------------------------------------------------------------------------------------------------------|
| <b>Design factors</b>     |                       |                                                                                                      |                 |                                                                                                                       |
| 1                         | Representation        | What does the robot look like to the participant?                                                    | 3               | Human_like = [1,6]<br>Animal_like = [1,6]<br>Machine_like = [1,6]                                                     |
| 2                         | Social Role           | What does the robot feel like to the participant?                                                    | 7               | Friend = [1,6]<br>Classmate = [1,6]<br>Teacher = [1,6]<br>Acquaintance = [1,6]<br>Stranger = [1,6]<br>Machine = [1,6] |
| <b>Experiment factors</b> |                       |                                                                                                      |                 |                                                                                                                       |
| 3                         | Engagement            | Level of involvement with the robot                                                                  | 5               | Eng_1...5 = [1,6]                                                                                                     |
| 4                         | Bonding               | How is the social-affective relationship between participant and robot tutor? (Konijn & Hoorn, 2017) | 5               | Bon_1...5 = [1,6]                                                                                                     |
| 5                         | Anthropomorphism      | Do the participants attribute human traits or emotion to the robot tutor? (Konijn & Hoorn, 2017)     | 4               | Anth_1...4 = [1,6]                                                                                                    |
| 6                         | Perceived realism     | Does robot tutor feel like a real creature or is it a fake? (Paauwe et al., 2015)                    | 4               | Real_1...4 = [1,6]                                                                                                    |
| 7                         | Perceived relevance   | Does the robot tutor have importance for doing the multiplication exercise? (Konijn & Hoorn, 2017)   | 4               | Rel_1...4 = [1,6]                                                                                                     |
| 8                         | Perceived affordances | What can I do with the robot (in view of multiplication exercise)? (Konijn & Hoorn, 2017)            | 4               | Aff_1...4 = [1,6]                                                                                                     |
| 9                         | Use intentions        | Want to use the robot again?                                                                         | 3               | Use_Int_1..3= [1,6]                                                                                                   |
| <b>Control factors</b>    |                       |                                                                                                      |                 |                                                                                                                       |
| 10                        | Novelty               | To what extent is the robot tutor new to the participant?                                            | 1               | Nov_1 = [1,6]                                                                                                         |
| 11                        | Aesthetics            | To what extent is the robot attractive to the participant in terms of appearance?                    | 1               | Aesr_1 = [1,6]                                                                                                        |
| 12                        | Gender                | /                                                                                                    | 1               | Gender = [Male, Female]                                                                                               |
| 15                        | Age                   | /                                                                                                    | 1               | Age = [7, 10]                                                                                                         |

Table 3. Questionnaire details

#### 5. Data Analysis in Brief

To check the Robot Design manipulation, participants rated the extent to which they believed their robot resembled a human, an animal, and a machine (i.e. Human-like, Animal-like, and Machine-like). We ran a General Linear Model Multivariate Analysis (MANOVA) of Robot Design (3) on the Representation ratings of Human-like, Animal-like, and Machine-like. Pupils judged their robots as significantly different in what they represented: The effects of Robot Design on the rating of Representation was significant (Wilks'  $\lambda = .57$ ,  $F_{(6,134)} = 7.17$ ,  $p < .000$ ,  $\eta^2 = .24$ ). Significant effects were found for Human-like ( $F_{(2,69)} = 8.32$ ,  $p = .001$ ) and Animal-like ( $F_{(2,69)} = 12.41$ ,  $p = .000$ ). Thus, the robots did not differ in their machine-likeness but they did differentiate according to their representation of a human being or an animal.

Six two-tailed independent *t*-tests of Robot Design (Humanoid-Puppy, Humanoid-Droid, and Puppy-Droid) on ratings of Human-like and Animal-likeness showed that Human-likeness of the Humanoid robot ( $n = 19$ ,  $M = 3.89$ ,  $SD = 1.91$ ) was significantly higher than that of Puppy ( $n = 26$ ,  $M = 1.88$ ,  $SD = 1.42$ ) ( $t_{(43)} = 4.05$ ,  $p = .000$ ). Human-likeness of Humanoid ( $n = 19$ ,  $M = 3.89$ ,  $SD = 1.91$ ) also was significantly higher than that of Droid ( $n = 27$ ,  $M = 2.26$ ,  $SD = 1.79$ ) ( $t_{(44)} = 2.97$ ,  $p = .005$ ). Human-likeness of Puppy ( $n = 26$ ,  $M = 1.88$ ,  $SD = 1.42$ ) and that of Droid ( $n = 27$ ,  $M = 2.26$ ,  $SD = 1.79$ ) did not significantly differ ( $t_{(51)} = -.84$ ,  $p = .40$ ). Animal-likeness of Humanoid ( $n = 19$ ,  $M = 1.95$ ,

$SD = 1.58$ ) was significantly lower than that of Puppy ( $n = 26$ ,  $M = 4.23$ ,  $SD = 1.82$ ) ( $t_{(43)} = -4.39$ ,  $p = .000$ ). The Animal-likeness of Humanoid ( $n = 19$ ,  $M = 1.95$ ,  $SD = 1.58$ ) and that of Droid ( $n = 27$ ,  $M = 2.22$ ,  $SD = 1.78$ ) did not significantly differ ( $t_{(44)} = -.54$ ,  $p = .59$ ) but the Animal-likeness of Puppy ( $n = 26$ ,  $M = 4.23$ ,  $SD = 1.82$ ) was significantly higher than that of Droid ( $n = 27$ ,  $M = 2.22$ ,  $SD = 1.78$ ) ( $t_{(51)} = 4.06$ ,  $p = .000$ ). Therefore, Humanoid was rated as more human-like and Puppy was more animal-like, whereas for Droid, no differences were significant. Thus, all robots were machine-like with Droid as the starting point, while Puppy added an animalistic and Humanoid a more humanlike impression.

As an extra control on the manipulation, we asked the pupils if they experienced the robot as a classmate, a teacher, a tutor, and other Social Roles. We ran three GLM Multivariate Analyses (MANOVA) of Social Role (Friend, Classmate, Teacher, etc.) on Human-like, Animal-like, and Machine-like as separate dependents so that effects would become significant easily. However, the different Social Roles were not significant for Human-likeness ( $F_{(30,246)} = .94$ ,  $p = .563$ ) and had no significant effect on Animal-likeness ( $F_{(30,246)} = 1.18$ ,  $p = .246$ ). The different Social Roles were significant for Machine-likeness ( $F_{(30,246)} = 1.75$ ,  $p = .012$ ): Between-subject effects indicated that the effect of Teacher ( $F_{(5,66)} = 2.75$ ,  $p = .026$ ) and the effect of Machine ( $F_{(5,66)} = 5.53$ ,  $p = .000$ ) on Machine-likeness were significant. However, there were six dependent variables in the analysis so that the rejection area should be corrected, according to Bonferroni ( $.05 / 6 = .0083$ ). Hence, only the categorization as Machine ( $F_{(5,66)} = 5.53$ ,  $p = .000$ ) exerted significant effects on Machine-likeness, indicating that students perceived a machine-like robot indeed as a machine.

To check on possible confounding effects of non-theoretical variables, we ran a School (2)  $\times$  Gender (2) ANCOVA on the Baseline score from the pre-test with Age as a covariate ( $N = 75$ ). The only significant difference was caused by Age ( $F_{(1,70)} = 4.35$ ,  $p = .041$ ) ( $r = .36$ ,  $p = .002$ ). With age, pupils performed better. School, Gender, and their interaction had no significant effect on Baseline performance. Only as isolated effects, while disregarding omnibus variance, did a two-tailed independent samples  $t$ -test show that the mean Baselines of Good Shepherd ( $n = 48$ ,  $M = 39.71$ ,  $SD = 15.85$ ) and Chun Lei ( $n = 27$ ,  $M = 32.63$ ,  $SD = 11.94$ ) significantly differed ( $t_{(73)} = 2.02$ ,  $p = .047$ ) in favor of Good Shepherd. Likewise, while ignoring overall variance, the Baseline means of Boys ( $n = 42$ ,  $M = 34.07$ ,  $SD = 13.81$ ) versus Girls ( $n = 33$ ,  $M = 41.09$ ,  $SD = 15.46$ ) significantly differed ( $t_{(73)} = -2.08$ ,  $p = .042$ ): Girls did more multiplications correct during the pre-test (not on the post-test after robot intervention as we shall see later). It seems that effects of School and Gender while significant on the detailed level ( $t$ -test) were spurious when more factors were added ( $F$ -test).

In a School (2)  $\times$  Gender (2) ANCOVA on FinMSco with Age as a covariate ( $N = 75$ ), none of the differences were significant. Although in an isolated correlation analysis, Age significantly affected the FinMSco ( $r = .24$ ,  $p = .039$ ), this relationship dissolved in the ANCOVA. Probably, the interaction with the robot countered the effect of Age on learning.

In addition, the correlation between Novelty and Fin\_min\_Base was not significant ( $r = .187$ ,  $p = .12$ ). Thus, novelty of the robot did not affect learning.

To explore the effects of the number of tutoring sessions on learning, we ran a number of tests with the factor Sessions (partaking once, twice, thrice). To see whether advancement level and number of sessions had an effect, we ran a GLM Univariate (ANCOVA) of Sessions (3)  $\times$  Advancement Level (4) on Fin\_min\_Base with Age as a covariate. Yet, the interaction was not significant ( $F = .668$ ).

We also conducted a One-way ANOVA of Sessions (participating once, twice, thrice) on Fin\_min\_Base without other variables involved but still no significant effects were established ( $F_{(2,71)} = .866$ ,  $p = .425$ ). More robot-tutoring sessions did not improve learning performance any further.

Notwithstanding that there was not much difference among the groups that took one, two, or three tutorial sessions, yet, within each group, we wanted to know how big the learning gain was. We conducted three paired samples  $t$ -tests of Sessions on Baseline score versus FinMSco, representing the gain in absolute numbers and in percentages.

Mean improvement after robot tutoring once ( $N = 75$ ), twice ( $n = 13$ ), or thrice ( $n = 14$ ).

| Number of Sessions | $M_{Baseline}$ | $M_{FinMSco}$ | $t$                | Sig. (2-tailed) | $M_{Fin\_min\_Base}^a$ | $M_{Per\_Fin\_min\_Base}^b$ |
|--------------------|----------------|---------------|--------------------|-----------------|------------------------|-----------------------------|
| 1                  | 39.71          | 48.13         | $t_{(48)} = -5.66$ | .000            | 8.42                   | 21.20%                      |

|                     |       |       |                    |      |       |        |
|---------------------|-------|-------|--------------------|------|-------|--------|
| <b>Sessions = 2</b> | 35.38 | 43.06 | $t_{(16)} = -3.13$ | .007 | 7.68  | 21.70% |
| <b>Sessions = 3</b> | 28.64 | 39.18 | $t_{(11)} = -2.94$ | .015 | 10.54 | 36.80% |

<sup>a</sup> Fin\_min\_Base = FinMSco – Baseline

<sup>b</sup> Per\_Fin\_Min\_Base = Fin\_min\_Base / Baseline

Those who worked once with the robot improved by 8.42 more answers correct (21.20%). Those who did two sessions had a 7.68 improvement (21.73%) compared to Baseline. Those who interacted thrice had a 10.54 improvement (36.83%) compared to Baseline. Although at face value, three times tutoring seems to be better, later in the paper we see that Oneway ANOVA pointed out that statistically, the differences among the number of sessions were not significant.

### Learning effects

H1 expected positive effects of Robot Design on learning with a significant advantage for Humanoid. H2 assumed differences in learning as a function of Advancement Level of the students, the Challenged students gaining significantly more from robot tutoring.

To test H1 and H2, we ran a GLM Repeated Measures of Robot Design (3)  $\times$  Advancement Level (4) (between-subjects) on the (within-subjects) number of equations correctly solved before (Baseline) and after (Final Score) robot tutoring ( $N = 75$ ). Note that this was the score in absolute numbers, not the percentage of gain relative to Baseline.

Our key finding was a significant and moderately strong main before-after effect on the absolute number of multiplications solved correctly ( $V = .50$ ,  $F_{(1,63)} = 62.43$ ,  $p = .000$ ,  $y_p^2 = .50$ ). The mean score  $M_{Final} = 45.73$  ( $SD = 17.40$ ) was significantly larger than  $M_{Baseline} = 37.16$  ( $SD = 14.88$ ) ( $t_{(74)} = 7.19$ ,  $p = .000$ ), the mean difference being 8.57 equations more solved correctly after one session of robot tutoring, irrespective of Robot Design or Advancement Level.

Multivariate tests also showed a significant second-order interaction among Robot Design, Advancement Level, and before-after score ( $V = .22$ ,  $F_{(6,63)} = 2.99$ ,  $p = .012$ ,  $y_p^2 = .22$ ). Inspection of the mean scores showed that the largest difference was established for Challenged pupils working with Humanoid ( $M_{Baseline} = 16.33$ ,  $SD = 6.03$ ;  $M_{Final} = 41.67$ ,  $SD = 17.93$ ) and a small reverse effect was found for Advanced pupils, working with Droid ( $M_{Baseline} = 69.33$ ,  $SD = 5.52$ ;  $M_{Final} = 68.00$ ,  $SD = 18.61$ ). Paired-samples  $t$ -test, however, showed that the effect for Challenged pupils working with Humanoid ( $n = 3$ ) was not significant (not even preceding Bonferroni correction):  $t_{(2)} = 3.51$ ,  $p = .072$ ; probably due to the large  $SD$ s and lack of power. No other main or interaction effects were significant except for the main effect of Advancement Level, which was a trivial finding obviously. H1 and H2 were refuted for learning gain in absolute numbers of correctly answered multiplications.

### Learning gain (difference scores)

GLM Repeated Measures accounts for multiple sources of variance and is therefore the strictest test on our hypotheses. To assess if nothing was gained at all from Robot Design or Advancement Level, we included fewer sources of variance in our analysis from the reasoning that if lenient tests do not render significant effects either, we can dismiss Robot Design and Advancement Level from our theorizing altogether.

Therefore, we calculated the difference score from the Final Mean Score (FinMSco) – Baseline Score = Final\_minus\_Baseline (Fin\_min\_Base). Whereas 64 pupils gained from robot tutoring, there were 11 (about 15%) who did not perform better but *worse* after robot interaction (Fin\_min\_Base = -1 to -35). Ten of the worse performers came from the categories Below Average and Challenged, the remaining one coming from Advanced.

For H1 on Robot Design, we ran a GLM univariate (ANOVA) of Robot Design (2)  $\times$  School (2)  $\times$  Gender (2) on Fin\_min\_Base with Age as a covariate ( $N = 75$ ). The only significant effect was the interaction of Robot Design  $\times$  School (2) ( $F_{(2,62)} = 3.33$ ,  $p = .042$ ). Yet, a two-tailed independent samples  $t$ -test indicated that the main effect of School on Fin\_min\_Base was not significant ( $t_{(73)} = -.17$ ,  $p = .86$ ). The factor Robot Design had three levels: Humanoid ( $n = 21$ ,  $M = 9.47$ ,  $SD = 1.72$ ), Puppy ( $n = 27$ ,  $M = 9.50$ ,  $SD = 1.83$ ), and Droid ( $n = 27$ ,  $M = 6.81$ ,  $SD = 1.96$ ). Therefore, we ran three two-tailed independent  $t$ -tests on Fin\_min\_Base but no significant effects occurred (Humanoid-Puppy:  $t_{(46)} = -.52$ ,  $p = .96$ ; Humanoid-Droid:  $t_{(46)} = .84$ ,  $p = .40$ ; Puppy-Droid:  $t_{(52)} = 1.01$ ,  $p = .32$ ).

Neither Robot Design nor School had a significant effect on learning gains as measured by Fin\_min\_Base.

We conjectured that perhaps certain Robot Designs exercised negative effects on learning. Therefore, we reran the analyses on the group that performed *worse* after robot tutoring. However, Robot Design and School again did not exert significant effects on Fin\_min\_Base. In all, the effects of schools, gender, and robot designs improved nor worsened the children's learning as measured through the difference scores.

For the 64 children (about 85%) that did show learning gains after robot intervention, we ran a paired samples *t*-test on Baseline versus FinMSco to see *how much* those children gained. The difference between Baseline ( $n = 64$ ,  $M = 37.98$ ,  $SD = 1.91$ ) and FinMSco ( $n = 64$ ,  $M = 49.14$ ,  $SD = 2.05$ ) was highly significant ( $t_{(63)} = -11.20$ ,  $p = .000$ ). On average, those who learned from the robot did over one-third better compared to Baseline. Although most children learned significantly from robot tutoring, the various robot designs did not significantly differentiate the learning effects, therefore countering H1.

Although Robot Design did not exact significant effects on learning, perhaps the experience of the design as Human-like, Animal-like, or Machine-like would, allowing yet another chance for H1 to come to expression; albeit in a more perceptual way. To check the effects of the childrens' perceptions of their robot on learning, we did regression analysis of Human-like, Animal-like, and Machine-like on Fin\_min\_Base. However, no significant relationship was established (Human-like:  $t = -.47$ ,  $p = .640$ ; Animal-like:  $t = -.52$ ,  $p = .610$ ; Machine-like:  $t = -.50$ ,  $p = .620$ ). Also with Gain percentage as dependent (Table 1: Per\_Fin\_min\_Base) significant effects remained absent (Human-like:  $t = -.26$ ,  $p = .800$ ; Animal-like:  $t = -1.16$ ,  $p = .250$ ; Machine-like:  $t = -.71$ ,  $p = .480$ ).

Combined with the results from the section on Learning effects, students perceived the robot as we expected but their perception had no effect on learning; not in absolute numbers of correct answers and not as a percentage of improvement from the Baseline. Although overall learning gains were achieved, the design of the robot embodiment or what it represented to the children did not matter, rejecting H1.

For H2 on Advancement Level, we ran a One-way ANOVA of Advancement Level on the difference score Fin\_min\_Base but none of the effects were significant ( $F_{(3,71)} = 1.58$ ,  $p = .202$ ). No matter how well or poor children performed initially, it did not affect their learning gain on average.

As stated under Measures, we devised another measure from the notion that children may not have gained differently in absolute numbers but that 8.57 more multiplications correct is a relatively stronger gain for a poor performer than for an excellent student. Learning gain, then, was calculated from the percentage of gain (Fin\_min\_Base) in relation to the Baseline (Per\_Fin\_min\_Base = Fin\_min\_Base / Baseline). With this measure, we ran a One-way ANOVA of Advancement Level on Per\_Fin\_min\_Base for  $N = 64$ , excluding those with a learning loss. This time, we *did* find significant effects ( $F_{(3,60)} = 12.66$ ,  $p = .000$ ).<sup>1</sup> On average, the gain percentage (Per\_Fin\_min\_Base) increased with the decrease of Advancement Level ( $r = -.53$ ,  $p = .000$ ) (Advanced:  $n = 10$ ,  $M = .17$  (17%),  $SD = .11$ ; Above Average:  $n = 19$ ,  $M = .22$  (22%),  $SD = .14$ ; Below Average:  $n = 25$ ,  $M = .35$  (35%),  $SD = .28$ ; Challenged:  $n = 10$ ,  $M = .90$  (90%),  $SD = .61$ ).

To scrutinize the individual contrasts, we did 6 two-tailed independent *t*-tests of Advancement Level with Bonferroni correction (Challenged – Below Average, Challenged – Above Average, Challenged – Advanced, Below Average – Above Average, Below Average – Advanced, Above Average – Advanced) on Per\_Fin\_min\_Base. The percentage of learning gain (Per\_Fin\_min\_Base) of pupils that were Challenged ( $n = 10$ ,  $M = .90$ ,  $SD = .61$ ) was significantly higher than those Below Average ( $n = 25$ ,  $M = .35$ ,  $SD = .28$ ), Above Average ( $n = 19$ ,  $M = .22$ ,  $SD = .14$ ), or Advanced ( $n = 10$ ,  $M = .17$ ,  $SD = .11$ ) (Challenged – Below Average:  $t_{(33)} = 3.68$ ,  $p = .001$ ; Challenged – Above Average:  $t_{(27)} = 4.69$ ,  $p = .000$ ; Challenged – Advanced:  $t_{(18)} = 3.73$ ,  $p = .002$ ). Yet, the differences among Below Average, Above Average, and Advanced were not significant. The effects were caused by the Challenged pupils ( $n = 10$ ), indicating that if weak students benefited, they benefited relatively

---

<sup>1</sup> Even with worse performers included, the effect was significant.

more (90% improvement on Baseline) from robot tutoring than others. Calculated as the relative improvement to their individual baselines, H2 was confirmed for Challenged students but not for other.

### Summary of findings for learning

1. Prior to robot intervention, pupils performed better with age and girls did better on baseline performance than boys. After 5 minutes of robot interaction, these differences disappeared
2. Most children (~85%) learned from the robot, a small group (~15%) performed worse
3. Those who learned from the robot had an average of more than one-third gain after tutoring
4. The weakest students that gained from robot tutoring did so in percentage of gain (90%), not in absolute numbers, compared to their earlier achievements
5. School, gender, design of the robot, the number of times these children were tutored, nor the experience of novelty of the robot were influential for learning through robot tutoring

### Experience

Although we had a range of psychometric scales on our questionnaire to measure dimensions of affect (i.e. Engagement, Bonding, Anthropomorphism, Perceived Realism, Relevance, Perceived Affordances, and Use Intentions), none but Bonding achieved convergent *and* divergent measurement reliability. Therefore, we decided to work with the only clear-cut case we had, Bonding, and not make *ad-hoc* decisions.

H3 expected that emotional bonding with the robot would positively affect the learning outcomes in a mediating or moderating way. To examine H3, we ran the previous GLM Repeated Measures again of Robot Design (3)  $\times$  Advancement Level (4) (between-subjects) on the (within-subjects) number of equations correctly solved before and after robot tutoring but now with mean Bonding as the covariate. However, mean Bonding exerted no significant main or interaction effects on the multiplication scores and the earlier pattern of results was not altered.

To let the presumed relation between bonding and learning happen more easily, we ran a two-tailed bivariate correlation analysis between  $M_{Bond}$  and  $Fin\_min\_Base$  ( $r = .007$ ,  $p = .951$ ) and between  $M_{Bond}$  and  $Per\_Fin\_min\_Base$  ( $r = -.076$ ,  $p = .531$ ). Yet, neither were significant.

Therefore, H3 was rejected. Bonding tendencies were independent from the design of the robot or the advancement level of the children. The level of bonding with a robot tutor seemed not to have any substantial correlation with learning, not in absolute numbers nor in relative gain.

To check if any of the non-theoretical variables would affect the level of learning and bonding, we conducted GLM Multivariate Analysis (MANOVA) of Robot Design (3)  $\times$  Advancement Level (4)  $\times$  School (2)  $\times$  Gender (2) on  $Fin\_min\_Base$  and  $M_{Bond}$  and on  $Per\_Fin\_min\_Base$  and  $M_{Bond}$  with Age, Novelty, and Aesthetics as covariates. The following results were obtained:

(1) The interaction of Robot Design  $\times$  School  $\times$  Gender on  $Fin\_min\_Base$  ( $F_{(1,30)} = 6.44$ ,  $p = .017$ ) was significant. However, earlier we showed that none of the contrasts in the factors Robot Design, School, and Gender were significant so that (1) can be considered a false positive.

(2) The interaction of Robot Design  $\times$  School  $\times$  Gender on  $Per\_Fin\_min\_Base$  ( $F_{(1,30)} = 9.56$ ,  $p = .004$ ) was significant. To scrutinize the contrasts of the factor Robot Design, we ran three independent samples *t*-tests on  $Per\_Fin\_min\_Base$ . Yet, none of the differences were significant (Humanoid – Puppy:  $t_{(43)} = .14$ ,  $p = .89$ ; Humanoid – Droid:  $t_{(44)} = 1.03$ ,  $p = .31$ ; Puppy – Droid:  $t_{(51)} = 1.18$ ,  $p = .24$ ). Additionally, neither the difference between School ( $t_{(70)} = -1.23$ ,  $p = .22$ ) nor that between Gender ( $t_{(70)} = .13$ ,  $p = .90$ ) was significant. We therefore conclude that the significant *F*-value for (2) came from the accumulation of noise in the contrasts.

(3) The interaction of Robot Design  $\times$  Advancement Level on  $Per\_Fin\_min\_Base$  ( $F_{(6,30)} = 4.15$ ,  $p = .004$ ) was the product of (4) and (5).

(4) The main effect of Robot Design on  $Per\_Fin\_min\_Base$  ( $F_{(2,30)} = 6.06$ ,  $p = .006$ ) was significant but as said in (2), the contrasts of the factor Robot Design were not so that the inconsistency between ANOVA and *t*-test indicates the propagation of noise from a set of non-

significant contrasts, resulting in a false-positive for the  $F$ -value.

(5) The main effect of Advancement Level on Per\_Fin\_min\_Base ( $F_{(3,30)} = 4.12, p = .015$ ). As shown earlier, we saw that Per\_Fin\_min\_Base decreased with the increase of Advancement, which was due to the group we regarded as Challenged.

(6) The only significant effect that included Bonding was that Aesthetics covaried with  $M_{Bond}$  ( $F_{(1,71)} = 13.21, p = .001$ ): A robot experienced as ‘prettier’ raised stronger bonding tendencies.

### *Effects on Bonding*

We ran a Univariate Analysis of Variance (ANOVA) of Robot Design and Advancement Level directly on mean Bonding. Not all children who took the multiplication test also filled out the questionnaire, therefore  $N = 70$ . The intercept was significantly different from zero so that Bonding tendencies did occur ( $F_{(1,58)} = 194.76, p = .000, \eta_p^2 = .77$ ). However, none of the main effects or interaction was significant ( $F < 1$ ). Robot Design nor Advancement Level exerted significant effects on Bonding.

As an extra exploration, we conducted an ANOVA of Robot Design ( $3 \times$ ) Advancement Level ( $4 \times$ ) School ( $2 \times$ ) Gender ( $2 \times$ ) on the grand averages of  $M_{Bond}$ , showing that only the difference in School was significant ( $F_{(1,34)} = 4.57, p = .04$ ). We ran an independent samples  $t$ -test of School on  $M_{Bond}$ , showing that Bonding at Good Shepherd was significantly higher than at Chun Lei ( $t_{(68)} = 2.99, p = .004$ ). Theoretically, this is an irrelevant finding.

We then ran three  $t$ -tests with Sessions as the grouping variable (once – twice, once – thrice, twice – thrice). The effects on  $M_{Bond}$  of Once and Thrice and that of Twice and Thrice were not significant (Once – Thrice:  $t_{(54)} = 1.31, p = .20$ ; Twice – Thrice:  $t_{(20)} = .97, p = .34$ ). However, the difference between Once and Twice was significant for  $M_{Bond}$  (Once – Twice:  $t_{(60)} = 3.01, p = .004$ ), even if  $p$  was corrected to .017 with respect to Bonferroni. Apparently, mean Bonding became less upon second encounter ( $M_{Bond1} = 3.60, SD = 1.64$ ;  $M_{Bond2} = 2.19; SD = 1.70$ ), which was due to Chun Lei pupils alone. The insignificant difference with those encountering the robot thrice might indicate a ceiling effect.

We wondered if the high bonding upon first encounter was due to a novelty effect, wearing off after multiple encounters. Therefore, we correlated  $M_{Bond}$  with Novelty and found that the correlation was significant but not very strong ( $r = .31, p = .01$ ). Children from Chun Lei saw the robot more often so that less novelty may have led to lower rates of bonding.  $M_{Bond}$  also correlated with Aesthetics ( $r = .56, p = .000$ ), indicating that the experience of ‘prettier’ led to stronger bonding tendencies as supported by the covariance analysis earlier on.

### **Summary of findings for experience**

With respect to the experience of the robot tutor as a social entity, we found that:

1. The pupils perceived the robot as intended (manipulation successful)
2. The social role they attributed to the robots had no significant effect on their perceptions of human, animal, or machine-likeness, except that the role of ‘machine’ indeed raised significant machine-likeness, which a trivial finding
3. From a design perspective, the Bioloids to these children were basically all machines like Droid, while Puppy added animal-like features to that basic frame and Humanoid added human-like features to it. However, type of robot (humanoid, animal, or machine) did not affect the bonding tendencies
4. Only the Bonding scale was psychometrically reliable and all other measures for these children seemed to be related to that experience or were confusing
5. Bonding had no significant relation with learning gains. In 5 minutes of robot training, children improved their skills irrespective of the quality of the established relationship
6. The Good Shepherd children experienced more bonding with their robot tutor than Chun Lei pupils, maybe owing to a novelty effect
7. Stronger perceptions of the robot’s attractiveness (‘beautiful’) were associated with stronger bonding tendencies

## 6. Data Analysis Extended

We did our data analysis in SPSS (version 23...0) and started with the effects on learning gains and then the effects on the experience during robot interaction. After exploring the learning gains, we inspected the theoretically less interesting variables, such as Age, School, and Gender in the hope that they did not sort significant effects. For the experiential variables, we started with reliability analysis of the scales and tested the effects of various design factors on experience. Lastly, we looked into the interaction between experience and learning gains.

H1 expected positive effects of Robot Design on learning with a significant advantage for Humanoid. H2 assumed differences in learning as a function of Advancement Level of the students, the Challenged students gaining significantly more from robot tutoring.

To test H1 and H2, we ran a GLM Repeated Measures of Robot Design (3)  $\times$  Advancement Level (4) (between-subjects) on the (within-subjects) number of equations correctly solved before (Baseline) and after (Final Score) robot tutoring ( $N = 75$ ). Note that this was the score in absolute numbers, not the percentage of gain relative to Baseline.

We found a significant and moderately strong main before-after effect on the absolute number of multiplications solved correctly ( $V = .50$ ,  $F_{(1,63)} = 62.43$ ,  $p = .000$ ,  $y_p^2 = .50$ ). The mean score  $M_{Final} = 45.73$  ( $SD = 17.40$ ) was significantly larger than  $M_{Baseline} = 37.16$  ( $SD = 14.88$ ) ( $t_{(74)} = 7.19$ ,  $p = .000$ ), the mean difference being 8.57 equations more solved correctly after robot tutoring, irrespective of Robot Design or Advancement Level.

Multivariate tests also showed a significant second-order interaction among Robot Design, Advancement Level, and before-after score ( $V = .22$ ,  $F_{(6,63)} = 2.99$ ,  $p = .012$ ,  $y_p^2 = .22$ ). Inspection of the mean scores showed that the largest difference was established for Challenged pupils working with Humanoid ( $M_{Baseline} = 16.33$ ,  $SD = 6.03$ ;  $M_{Final} = 41.67$ ,  $SD = 17.93$ ) and a small reverse effect was found for Advanced pupils, working with Droid ( $M_{Baseline} = 69.33$ ,  $SD = 5.52$ ;  $M_{Final} = 68.00$ ,  $SD = 18.61$ ). Paired-samples  $t$ -test, however, showed that the effect for Challenged pupils working with Humanoid ( $n = 3$ ) was not significant (not even preceding Bonferroni correction):  $t_{(2)} = 3.51$ ,  $p = .072$ ; probably due to the large  $SD$ s and lack of power. No other main or interaction effects were significant (see next) except for Advancement Level, which was a trivial finding obviously. H1 and H2 were refuted for learning gain counted in absolute numbers. Next we run a number of checks and controls for possible confounds.

## 7. Effect of Age, School, Gender, and Novelty on Baseline and FinMSco

There are several variables of little theoretical interest (e.g., Age, School, Gender), so we wanted to check if they have a significant effect. If not, we would dismiss them from the main analyses.

### 7.1. Outlier Analysis on Baseline - find the extreme values

To find out the outliers who did very good or bad on their Baseline, we conducted an outlier analysis on Baseline to find the extremes (Table 4).

| Extreme Values |         |   |             |       |
|----------------|---------|---|-------------|-------|
|                |         |   | Case Number | Value |
| Baseline       | Highest | 1 | 73          | 78.00 |
|                |         | 2 | 71          | 69.00 |
|                |         | 3 | 72          | 69.00 |
|                |         | 4 | 70          | 65.00 |
|                |         | 5 | 75          | 64.00 |
|                | Lowest  | 1 | 25          | 10.00 |
|                |         | 2 | 1           | 10.00 |
|                |         | 3 | 3           | 17.00 |
|                |         | 4 | 64          | 20.00 |
|                |         | 5 | 22          | 20.00 |

Table 4: Extreme values of Baseline

Table 4 shows the extreme values found for Baseline. Five people had extremely high performance and five people extremely poor performance.

### 7.2. Two-tailed Correlation Between Baseline-Age and FinMSco-Age\*

To verify whether Age can be omitted from analysis, we ran a two-tailed bivariate correlation analysis between Baseline and Age (Table 5) and between FinMSco and Age (Table 6).

| Correlations |                     | Baseline | Age    |
|--------------|---------------------|----------|--------|
| Baseline     | Pearson Correlation | 1        | .358** |
|              | Sig. (2-tailed)     |          | .002   |
|              | N                   | 75       | 75     |
| Age          | Pearson Correlation | .358**   | 1      |
|              | Sig. (2-tailed)     | .002     |        |
|              | N                   | 75       | 75     |

\*\*. Correlation is significant at the 0.01 level (2-tailed).

Table 5. Correlation between Baseline and Age

| Correlations               |                     | Final Multiplication Score | Age   |
|----------------------------|---------------------|----------------------------|-------|
| Final Multiplication Score | Pearson Correlation | 1                          | .239* |
|                            | Sig. (2-tailed)     |                            | .039  |
|                            | N                   | 75                         | 75    |
| Age                        | Pearson Correlation | .239*                      | 1     |
|                            | Sig. (2-tailed)     | .039                       |       |
|                            | N                   | 75                         | 75    |

\*. Correlation is significant at the 0.05 level (2-tailed).

Table 6. Correlation between FinMSco and Age

Table 5 shows that the correlation between Baseline and Age is significant ( $r = .36$ ,  $p = .002$ ). Similarly, Table 6 shows that the correlation between FinMSco and Age is significant ( $r = .24$ ,  $p = .039$ ), implying that Age should not be omitted from analysis. The older participants performed better on both Baseline and FinMSco. On the other hand, the correlation coefficient for the Age-Baseline test is .36 (medium correlation) and after robot intervention that for the Age-FinMSco is .24 (low correlation), indicating that the robot tutoring perhaps diminished the effect of Age on learning.

### 7.3. Two-tailed Correlation Between Novelty and Fin\_min\_Base

To check whether the difference scores (Fin\_min\_Base) were affected by the newness of the robot experience, we ran a two-tailed bivariate correlation analysis between Novelty and Fin\_min\_Base (Table 7).

| Correlations |                     | Nov_1 | Fin_min_Base |
|--------------|---------------------|-------|--------------|
| Nov_1        | Pearson Correlation | 1     | .187         |
|              | Sig. (2-tailed)     |       | .121         |
|              | N                   | 70    | 70           |
| Fin_min_Base | Pearson Correlation | .187  | 1            |
|              | Sig. (2-tailed)     | .121  |              |
|              | N                   | 70    | 75           |

Table 7. Correlation between Fin\_min\_Base and Novelty

Table 7 shows that the correlation between Novelty and Fin\_min\_Base ( $r = .187$ ,  $p = .12$ ) was not significant. That means novelty of the robot did not influence the learning.

### 7.4. Two-tailed Independent Samples T-test of School on Baseline

To check whether School could be omitted from the analyses, we ran a two-tailed independent samples *t*-test on Baseline with the two schools (ChunLei and GoodShepherd) (Table 8).

| Group Statistics       |    |         |                |                 |
|------------------------|----|---------|----------------|-----------------|
| School                 | N  | Mean    | Std. Deviation | Std. Error Mean |
| Baseline Good Shepherd | 48 | 39.7083 | 15.84897       | 2.28760         |
| Chun Lei               | 27 | 32.6296 | 11.94265       | 2.29836         |

| Independent Samples Test |                             |                                         |      |                              |        |                 |                 |                       |                                                          |
|--------------------------|-----------------------------|-----------------------------------------|------|------------------------------|--------|-----------------|-----------------|-----------------------|----------------------------------------------------------|
|                          |                             | Levene's Test for Equality of Variances |      | t-test for Equality of Means |        |                 |                 |                       |                                                          |
|                          |                             | F                                       | Sig. | t                            | df     | Sig. (2-tailed) | Mean Difference | Std. Error Difference | 95% Confidence Interval of the Difference<br>Lower Upper |
| Baseline                 | Equal variances assumed     | 4.355                                   | .040 | 2.018                        | 73     | .047            | 7.07870         | 3.50697               | .08933 14.06808                                          |
|                          | Equal variances not assumed |                                         |      | 2.183                        | 66.777 | .033            | 7.07870         | 3.24278               | .60570 13.55171                                          |

Table 8. Independent Samples T-test on Baseline with groups School

The results in Table 8 show that the mean difference between the Baseline of GoodShepherd ( $n = 48$ ,  $M = 39.71$ ,  $SD = 15.85$ ) and ChunLei ( $n = 27$ ,  $M = 32.63$ ,  $SD = 11.94$ ) is significant ( $t_{(73)} = 2.02$ ,  $p = .047$ ). Therefore, School should not be omitted in later analyses.

### 7.5. Two-tailed Independent Samples T-test of Gender on Baseline

To check whether Gender (Male and Female) can be omitted from the later analyses, we ran a two-tailed independent samples  $t$ -test on Baseline with male vs. female (Table 9).

| Group Statistics |        |    |         |                |                 |
|------------------|--------|----|---------|----------------|-----------------|
| Gender           |        | N  | Mean    | Std. Deviation | Std. Error Mean |
| Baseline         | Male   | 42 | 34.0714 | 13.80949       | 2.13085         |
|                  | Female | 33 | 41.0909 | 15.46238       | 2.69166         |

  

| Independent Samples Test |                             |                                         |      |                              |        |                 |                 |                       |                                                          |
|--------------------------|-----------------------------|-----------------------------------------|------|------------------------------|--------|-----------------|-----------------|-----------------------|----------------------------------------------------------|
|                          |                             | Levene's Test for Equality of Variances |      | t-test for Equality of Means |        |                 |                 |                       |                                                          |
|                          |                             | F                                       | Sig. | t                            | df     | Sig. (2-tailed) | Mean Difference | Std. Error Difference | 95% Confidence Interval of the Difference<br>Lower Upper |
| Baseline                 | Equal variances assumed     | 2.531                                   | .116 | -2.073                       | 73     | .042            | -7.01948        | 3.38630               | -13.76837 -.27059                                        |
|                          | Equal variances not assumed |                                         |      | -2.045                       | 64.810 | .045            | -7.01948        | 3.43301               | -13.87605 -.16291                                        |

Table 9. Independent Samples T-test on Baseline with Gender

Table 9 shows that the difference between the means of Baseline of Males ( $n = 42$ ,  $M = 34.07$ ,  $SD = 13.81$ ) and Females ( $n = 33$ ,  $M = 41.09$ ,  $SD = 15.46$ ) is significant ( $t_{(73)} = -2.08$ ,  $p = .042$ ). Therefore, Gender should not be omitted from the analyses. Girls did more multiplications correct on the baseline test.

### 7.6. School (2) $\times$ Gender (2) ANOVA on Baseline with Age as covariate

To inspect the interaction effect of School and Gender on Baseline, we ran a School (2)  $\times$  Gender (2) ANOVA on Baseline with Age as a covariate.

| Descriptive Statistics       |        |         |                |    |
|------------------------------|--------|---------|----------------|----|
| Dependent Variable: Baseline |        |         |                |    |
| School                       | Gender | Mean    | Std. Deviation | N  |
| Good Shepherd                | Male   | 36.3077 | 15.59428       | 26 |
|                              | Female | 43.7273 | 15.53853       | 22 |
|                              | Total  | 39.7083 | 15.84897       | 48 |
| Chun Lei                     | Male   | 30.4375 | 9.65380        | 16 |
|                              | Female | 35.8182 | 14.56584       | 11 |
|                              | Total  | 32.6296 | 11.94265       | 27 |
| Total                        | Male   | 34.0714 | 13.80949       | 42 |
|                              | Female | 41.0909 | 15.46238       | 33 |
|                              | Total  | 37.1600 | 14.87792       | 75 |

Table 10. Mean of School (2)  $\times$  Gender (2) ANOVA on Baseline with Age as covariate

**Tests of Between-Subjects Effects**

Dependent Variable: Baseline

| Source          | Type III Sum of Squares | df | Mean Square | F     | Sig. | Partial Eta Squared |
|-----------------|-------------------------|----|-------------|-------|------|---------------------|
| Corrected Model | 2569.199 <sup>a</sup>   | 4  | 642.300     | 3.255 | .017 | .157                |
| Intercept       | 55.249                  | 1  | 55.249      | .280  | .598 | .004                |
| Age             | 858.595                 | 1  | 858.595     | 4.352 | .041 | .059                |
| School          | .282                    | 1  | .282        | .001  | .970 | .000                |
| Gender          | 414.992                 | 1  | 414.992     | 2.103 | .151 | .029                |
| School * Gender | 1.268                   | 1  | 1.268       | .006  | .936 | .000                |
| Error           | 13810.881               | 70 | 197.298     |       |      |                     |
| Total           | 119945.000              | 75 |             |       |      |                     |
| Corrected Total | 16380.080               | 74 |             |       |      |                     |

a. R Squared = .157 (Adjusted R Squared = .109)

Table 11. School (2) × Gender (2) ANOVA on Baseline with Age as covariate

According to Table 11, the only significant difference is caused by Age ( $F_{(1,70)} = 4.35, p = .041$ ). With age, pupils performed better, which is consistent with the result of (1.2). School, Gender, and their interaction had not influence on the Baseline. This is inconsistent with the findings in the t-test on School (1.4) and the t-test on Gender (1.5). This finding may indicate that the significant effects on the detailed level are spurious when more factors are added.

### 7.7. School (2) × Gender (2) ANOVA on FinMSco with Age as covariate

To inspect the interaction effect of School and Gender on FinMSco, we ran a School (2) × Gender (2) ANOVA on FinMSco with Age as a covariate.

**Descriptive Statistics**

Dependent Variable: Final Multiplication Score

| School        | Gender | Mean    | Std. Deviation | N  |
|---------------|--------|---------|----------------|----|
| Good Shepherd | Male   | 44.8462 | 17.75318       | 26 |
|               | Female | 52.0000 | 19.62506       | 22 |
|               | Total  | 48.1250 | 18.78051       | 48 |
| Chun Lei      | Male   | 38.4375 | 13.52020       | 16 |
|               | Female | 45.9091 | 13.95317       | 11 |
|               | Total  | 41.4815 | 13.94045       | 27 |
| Total         | Male   | 42.4048 | 16.40056       | 42 |
|               | Female | 49.9697 | 17.94694       | 33 |
|               | Total  | 45.7333 | 17.39551       | 75 |

Table 12. Means of School (2) × Gender (2) on FinMSco with Age as covariate

**Tests of Between-Subjects Effects**

Dependent Variable: Final Multiplication Score

| Source          | Type III Sum of Squares | df | Mean Square | F     | Sig. | Partial Eta Squared |
|-----------------|-------------------------|----|-------------|-------|------|---------------------|
| Corrected Model | 2012.546 <sup>a</sup>   | 4  | 503.136     | 1.728 | .154 | .090                |
| Intercept       | 108.532                 | 1  | 108.532     | .373  | .543 | .005                |
| Age             | 276.110                 | 1  | 276.110     | .948  | .333 | .013                |
| School          | 42.657                  | 1  | 42.657      | .147  | .703 | .002                |
| Gender          | 697.505                 | 1  | 697.505     | 2.396 | .126 | .033                |
| School * Gender | 5.621                   | 1  | 5.621       | .019  | .890 | .000                |
| Error           | 20380.121               | 70 | 291.145     |       |      |                     |
| Total           | 179258.000              | 75 |             |       |      |                     |
| Corrected Total | 22392.667               | 74 |             |       |      |                     |

a. R Squared = .090 (Adjusted R Squared = .038)

Table 13. School (2) × Gender (2) ANOVA on FinMSco with Age as covariate

According to Table 13, none of the differences is significant. Therefore, the interaction of School and Gender with Age had no influence on the FinMSco. In comparing Table 11 and 13, we found that Age

had an effect on Baseline but no effect on FinMSco. Therefore, robot interaction probably diminished the effect of Age on learning. The result is consistent with that of the two-tailed bivariate correlation analysis on Age with Baseline and FinMSco (1.3), respectively.

In comparing Table 10 and 12, we found both girls and boys showed an increase in mean difference scores regardless of the schools they came from. For the pupils from Good Shepherd, boys and girls showed a similar mean increase (8.5 for boys and 8.3 for girls). For the pupils from Chun Lei, girls had greater increases in mean difference score (10.1 for girls vs. 8.0 for boys).

## 7.8. Conclusion

From the analyses of this part, we found:

- 1) Novelty had no effect on Fin\_min\_Base,
- 2) Robot Design diminished the effect of Age on learning,
- 3) We could not omit School and Gender because they exerted significant effects on Baseline and FinMSco, albeit inconsistently.

## 8. Effect of School, Robot Design, and Gender on Fin\_min\_Base

In the previous analyses, the between-subject variables (School, Gender) had inconsistent effects on the Baseline and FinMSco, which indicated that we cannot omit the above variables when exploring their interaction effect on Fin\_min\_Base (learning gain). In this part, we investigated factors (School, Gender, and Robot Design) that may contribute to Fin\_min\_Base (learning gains).

### 8.1. Fin\_min\_Base calculation

To study the learning gains, we calculated the difference score Fin\_min\_Base from FinMSco – Baseline. Whereas 64 pupils gained from robot tutoring, there were 11 who did not perform better but *worse* after robot exposure (Fin\_min\_Base = -1 to -35) (Table 14).

|    | School | Robot | Advancement | Baseline | BasePerf | MuSc1 | MuSc2 | MuSc3 | ParTake | FinMSco | Fin_min_Base |
|----|--------|-------|-------------|----------|----------|-------|-------|-------|---------|---------|--------------|
| 1  | 1.00   | 1.00  | 2.0         | 27.00    | 2.00     | 10.00 | .     | .     | 1.00    | 24.00   | -3.00        |
| 2  | 1.00   | 1.00  | 2.0         | 27.00    | 2.00     | 12.00 | .     | .     | 1.00    | 22.00   | -5.00        |
| 3  | 1.00   | 1.00  | 2.0         | 28.00    | 2.00     | 13.00 | .     | .     | 1.00    | 27.00   | -1.00        |
| 4  | 2.00   | 1.00  | 2.0         | 30.00    | 2.00     | 8.00  | 6     | .     | 2.00    | 27.00   | -3.00        |
| 5  | 2.00   | 2.00  | 2.0         | 24.00    | 2.00     | .00   | 0     | .00   | .       | 13.00   | -11.00       |
| 6  | 1.00   | 2.00  | 2.0         | 31.00    | 2.00     | 3.00  | .     | .     | 1.00    | 28.00   | -3.00        |
| 7  | 2.00   | 2.00  | 2.0         | 36.00    | 2.00     | .00   | 4     | 3.00  | 3.00    | 35.00   | -1.00        |
| 8  | 2.00   | 3.00  | 1.0         | 22.00    | 2.00     | .00   | 4     | .     | 2.00    | 16.00   | -6.00        |
| 9  | 1.00   | 3.00  | 2.0         | 35.00    | 2.00     | 9.00  | .     | .     | 1.00    | 33.00   | -2.00        |
| 10 | 2.00   | 3.00  | 2.0         | 31.00    | 2.00     | 4.00  | 3     | .     | 2.00    | 30.00   | -1.00        |
| 11 | 1.00   | 3.00  | 4.0         | 65.00    | 1.00     | 11.00 | .     | .     | 1.00    | 30.00   | -35.00       |

Table 14. Reverse influence of the robot on teaching the participants

### 8.2. School (2) × Robot (2) × Gender (2) ANOVA on Fin\_min\_Base with Age as covariate

To explore how the three between-subject factors (School, Gender, and Robot Design) affected the learning gains (Fin\_min\_Base), we ran a GLM univariate (ANOVA) of School (2) × Robot (2) × Gender (2) on Fin\_min\_Base with Age as a covariate (Table 15).

### Tests of Between-Subjects Effects

Dependent Variable: Fin\_min\_Base

| Source                  | Type III Sum of Squares | df | Mean Square | F     | Sig. | Partial Eta Squared |
|-------------------------|-------------------------|----|-------------|-------|------|---------------------|
| Corrected Model         | 1377.151 <sup>a</sup>   | 12 | 114.763     | 1.091 | .383 | .174                |
| Intercept               | 230.934                 | 1  | 230.934     | 2.196 | .143 | .034                |
| Age                     | 106.528                 | 1  | 106.528     | 1.013 | .318 | .016                |
| School                  | 26.302                  | 1  | 26.302      | .250  | .619 | .004                |
| Robot                   | 162.531                 | 2  | 81.265      | .773  | .466 | .024                |
| Gender                  | 12.784                  | 1  | 12.784      | .122  | .729 | .002                |
| School * Robot          | 700.133                 | 2  | 350.067     | 3.328 | .042 | .097                |
| School * Gender         | 12.301                  | 1  | 12.301      | .117  | .734 | .002                |
| Robot * Gender          | 54.255                  | 2  | 27.127      | .258  | .773 | .008                |
| School * Robot * Gender | 338.231                 | 2  | 169.116     | 1.608 | .209 | .049                |
| Error                   | 6521.195                | 62 | 105.181     |       |      |                     |
| Total                   | 13411.000               | 75 |             |       |      |                     |
| Corrected Total         | 7898.347                | 74 |             |       |      |                     |

a. R Squared = .174 (Adjusted R Squared = .015)

Table 15. School (2) × Robot (2) × Gender (2) ANOVA on Fin\_min\_Base

According to Table 15, the only significant difference is caused by the interaction of School × Robot ( $F_{(2,62)} = 3.33, p = .042$ ). Therefore, we looked into the details of their interaction effect.

### 8.3. Two-tailed Independent Samples T-test of School and Robot Design on Fin\_min\_Base

To study the effect of School on Fin\_min\_Base, we ran a two-tailed independent samples t-test (Table 16).

| Group Statistics |               |    |        |                |                 |  |  |  |  |
|------------------|---------------|----|--------|----------------|-----------------|--|--|--|--|
| School           |               | N  | Mean   | Std. Deviation | Std. Error Mean |  |  |  |  |
| Fin_min_Base     | Good Shepherd | 48 | 8.4167 | 10.29115       | 1.48540         |  |  |  |  |
|                  | Chun Lei      | 27 | 8.8519 | 10.59283       | 2.03859         |  |  |  |  |

  

| Independent Samples Test |                             |                                         |      |                              |        |                 |                 |                       |                                           |
|--------------------------|-----------------------------|-----------------------------------------|------|------------------------------|--------|-----------------|-----------------|-----------------------|-------------------------------------------|
|                          |                             | Levene's Test for Equality of Variances |      | t-test for Equality of Means |        |                 |                 |                       |                                           |
|                          |                             | F                                       | Sig. | t                            | df     | Sig. (2-tailed) | Mean Difference | Std. Error Difference | 95% Confidence Interval of the Difference |
| Fin_min_Base             | Equal variances assumed     | .333                                    | .566 | -.174                        | 73     | .862            | -.43519         | 2.50176               | -5.42118 4.55081                          |
|                          | Equal variances not assumed |                                         |      | -.173                        | 52.716 | .864            | -.43519         | 2.52235               | -5.49502 4.62465                          |

Table 16. Independent Samples T-test of School on Fin\_min\_Base

In Table 16, the mean difference between the schools is not significant ( $t_{(73)} = -.17, p = .86$ ), so School does not have a significant effect on Fin\_min\_Base. To study the effect of Robot on the Fin\_min\_Base, we ran three two-tailed independent t-tests of Robot Design (Humanoid-Puppy, Humanoid-Droid, and Puppy-Droid) on Fin\_min\_Base.

| Group Statistics |          |    |        |                |
|------------------|----------|----|--------|----------------|
| Robot            |          | N  | Mean   | Std. Deviation |
| Fin_min_Base     | Humanoid | 21 | 9.4762 | 10.71736       |
|                  | Puppy    | 27 | 9.6296 | 9.50364        |

| Independent Samples Test |                             |                                         |      |                              |        |                 |                 |                       |                                                          |
|--------------------------|-----------------------------|-----------------------------------------|------|------------------------------|--------|-----------------|-----------------|-----------------------|----------------------------------------------------------|
|                          |                             | Levene's Test for Equality of Variances |      | t-test for Equality of Means |        |                 |                 |                       |                                                          |
|                          |                             | F                                       | Sig. | t                            | df     | Sig. (2-tailed) | Mean Difference | Std. Error Difference | 95% Confidence Interval of the Difference<br>Lower Upper |
| Fin_min_Base             | Equal variances assumed     | .456                                    | .503 | -.052                        | 46     | .958            | -.15344         | 2.92394               | -6.03902 5.73214                                         |
|                          | Equal variances not assumed |                                         |      | -.052                        | 40.338 | .959            | -.15344         | 2.96897               | -6.15238 5.84550                                         |

Table 17. Independent samples t-test on Fin\_min\_Base between Humanoid and Puppy

| Group Statistics |          |    |        |                |                 |
|------------------|----------|----|--------|----------------|-----------------|
|                  | Robot    | N  | Mean   | Std. Deviation | Std. Error Mean |
| Fin_min_Base     | Humanoid | 21 | 9.4762 | 10.71736       | 2.33872         |
|                  | Droid    | 27 | 6.8148 | 10.95809       | 2.10889         |

| Independent Samples Test |                             |                                         |      |                              |        |                 |                 |                       |                                                          |
|--------------------------|-----------------------------|-----------------------------------------|------|------------------------------|--------|-----------------|-----------------|-----------------------|----------------------------------------------------------|
|                          |                             | Levene's Test for Equality of Variances |      | t-test for Equality of Means |        |                 |                 |                       |                                                          |
|                          |                             | F                                       | Sig. | t                            | df     | Sig. (2-tailed) | Mean Difference | Std. Error Difference | 95% Confidence Interval of the Difference<br>Lower Upper |
| Fin_min_Base             | Equal variances assumed     | .244                                    | .624 | .843                         | 46     | .404            | 2.66138         | 3.15807               | -3.69550 9.01825                                         |
|                          | Equal variances not assumed |                                         |      | .845                         | 43.582 | .403            | 2.66138         | 3.14913               | -3.68699 9.00975                                         |

Table 18. Independent samples t-test on Fin\_min\_Base between Humanoid and Droid

| Group Statistics |       |    |        |                |                 |
|------------------|-------|----|--------|----------------|-----------------|
|                  | Robot | N  | Mean   | Std. Deviation | Std. Error Mean |
| Fin_min_Base     | Puppy | 27 | 9.6296 | 9.50364        | 1.82898         |
|                  | Droid | 27 | 6.8148 | 10.95809       | 2.10889         |

| Independent Samples Test |                             |                                         |      |                              |        |                 |                 |                       |                                                          |
|--------------------------|-----------------------------|-----------------------------------------|------|------------------------------|--------|-----------------|-----------------|-----------------------|----------------------------------------------------------|
|                          |                             | Levene's Test for Equality of Variances |      | t-test for Equality of Means |        |                 |                 |                       |                                                          |
|                          |                             | F                                       | Sig. | t                            | df     | Sig. (2-tailed) | Mean Difference | Std. Error Difference | 95% Confidence Interval of the Difference<br>Lower Upper |
| Fin_min_Base             | Equal variances assumed     | .005                                    | .943 | 1.008                        | 52     | .318            | 2.81481         | 2.79151               | -2.78677 8.41640                                         |
|                          | Equal variances not assumed |                                         |      | 1.008                        | 50.980 | .318            | 2.81481         | 2.79151               | -2.78944 8.41907                                         |

Table 19. Independent samples t-test on Fin\_min\_Base between Puppy and Droid

In Table 17, 18, and 19, the three comparisons among Humanoid ( $n = 21$ ,  $M = 9.47$ ,  $SD = 1.72$ ), Puppy ( $n = 27$ ,  $M = 9.50$ ,  $SD = 1.83$ ), and Droid ( $n = 27$ ,  $M = 6.81$ ,  $SD = 1.96$ ) yielded no significant effects (Humanoid-Puppy:  $t_{(46)} = -.52$ ,  $p = .96$ ; Humanoid-Droid:  $t_{(46)} = .84$ ,  $p = .40$ ; Puppy-Droid:  $t_{(52)} = 1.01$ ,  $p = .32$ ). Neither School nor Robot had a significant effect on Fin\_min\_Base (learning gains).

We reran the analyses on the group that performed *worse* after robot tutoring. However, Robot and School again did not exert significant effects on Fin\_min\_Base.

In all, the differences between schools, gender, and types of robot improved nor worsened the children's learning gains as measured by Fin\_min\_Base.

#### 8.4. Paired Samples T-test on Baseline and FinMSco\*

As said, 64 children showed learning gains after robot intervention. We ran a paired samples t-test on Baseline and FinMSco to see how much those children gained.

| Paired Samples Statistics |                            |         |    |                |                 |
|---------------------------|----------------------------|---------|----|----------------|-----------------|
|                           |                            | Mean    | N  | Std. Deviation | Std. Error Mean |
| Pair 1                    | Baseline                   | 37.9844 | 64 | 15.29342       | 1.91168         |
|                           | Final Multiplication Score | 49.1406 | 64 | 16.36379       | 2.04547         |

| Paired Samples Test |                                       |                    |                |                 |                                           |          |         |                 |       |
|---------------------|---------------------------------------|--------------------|----------------|-----------------|-------------------------------------------|----------|---------|-----------------|-------|
|                     |                                       | Paired Differences |                |                 |                                           | t        | df      | Sig. (2-tailed) |       |
|                     |                                       | Mean               | Std. Deviation | Std. Error Mean | 95% Confidence Interval of the Difference |          |         |                 |       |
|                     |                                       |                    |                |                 | Lower                                     |          |         |                 | Upper |
| Pair 1              | Baseline - Final Multiplication Score | -11.15625          | 7.97261        | .99658          | -13.14775                                 | -9.16475 | -11.195 | 63              | .000  |

Table 20. Paired Samples T-test on Baseline and FinMSco

In Table 20, the difference between Baseline ( $n = 64$ ,  $M = 37.98$ ,  $SD = 1.91$ ) and FinMSco ( $n = 64$ ,  $M = 49.14$ ,  $SD = 2.05$ ) is highly significant ( $t_{(63)} = -11.20$ ,  $p = .000$ ). On average, those who learned from the robot did over one-third better compared to baseline.

## 8.5. Conclusion

We found:

- 1) Those who learned had an average of more than one-third gain after robot tutoring,
- 2) None of the factors (School, Gender, Robot Design) contributed to the learning gain.

## 9. Effects of Advancement and Partake on Fin\_min\_Base

We analyzed the level of Advancement of the various pupils and the number of times they participated in the tutoring sessions (Partake: 1, 2, or 3 times) for their effects on Fin\_min\_Base.

### 9.1. Advancement calculation

Before we explored the effect of level of advancement on Fin\_min\_Base, we categorized pupils according to their Baseline results. First, we calculated the average Baseline value ( $n = 75$ ,  $M = 37.16$ ,  $SD = 12.88$ ) (Table 21).

| Descriptive Statistics |    |         |         |         |                |
|------------------------|----|---------|---------|---------|----------------|
|                        | N  | Minimum | Maximum | Mean    | Std. Deviation |
| Baseline               | 75 | 10.00   | 78.00   | 37.1600 | 14.87792       |
| Valid N (listwise)     | 75 |         |         |         |                |

Table 21. Standardized value of Baseline

Then we categorized the students into four groups. Those who scored lower than one standard deviation below average ( $< 22.28$ ) were categorized as ‘challenged’ students. Those between one negative standard deviation and the average were categorized as ‘below average.’ Those between average and one positive standard deviation were categorized as ‘above average,’ and those beyond one positive standard deviation were categorized as ‘advanced’ students (see Table 22, upper panel).

| Categorization Name | Criteria                             | Number of students |
|---------------------|--------------------------------------|--------------------|
| Challenged          | Baseline $\leq 22.8$                 | 11                 |
| Below Average       | $22.8 < \text{Baseline} \leq 37.16$  | 34                 |
| Above Average       | $37.16 < \text{Baseline} \leq 52.04$ | 19                 |
| Advanced            | Baseline $> 52.04$                   | 11                 |

### 9.2. Inspection of the students who learned worse

We looked into the participants who suffered from learning loss after robot exposure and found that ten of them were categorized as Below Average and Challenged, the remaining one being Advanced (Table 22, lower panel). For both types of students, we know that (for different reasons) they can be easily distracted and have learning disabilities (e.g., Beckmann & Minnaert, 2018).

| Index | School | Robot | Gender | Advancement | Partake | Fin_min_Base |
|-------|--------|-------|--------|-------------|---------|--------------|
| 6     | 1      | 1     | 0      | 2           | 1       | -3           |
| 7     | 1      | 1     | 1      | 2           | 1       | -5           |
| 8     | 1      | 1     | 0      | 2           | 1       | -1           |
| 11    | 2      | 1     | 0      | 2           | 2       | -3           |
| 27    | 2      | 2     | 0      | 2           | 3       | -11          |

|    |   |   |   |   |   |     |
|----|---|---|---|---|---|-----|
| 31 | 1 | 2 | 0 | 2 | 1 | -3  |
| 41 | 2 | 2 | 1 | 2 | 3 | -1  |
| 53 | 2 | 3 | 0 | 1 | 2 | -6  |
| 60 | 1 | 3 | 1 | 2 | 1 | -2  |
| 63 | 2 | 3 | 1 | 2 | 2 | -1  |
| 70 | 1 | 3 | 1 | 4 | 1 | -35 |

Table 22. Advancement distribution (upper panel) and details of worse performers after robot tutoring (lower panel)

### 9.3. One-way ANOVA of Partake on Fin\_min\_Base

To explore the effect of Partake (the number of tutoring sessions) on Fin\_min\_Base (learning gains), we ran a one-way ANOVA on Fin\_min\_Base with Partake as the independent variable.

| Descriptives   |    |         |                |                      |                                  |                      |         |         |                            |
|----------------|----|---------|----------------|----------------------|----------------------------------|----------------------|---------|---------|----------------------------|
| Fin_min_Base   |    |         |                |                      |                                  |                      |         |         |                            |
|                | N  | Mean    | Std. Deviation | Std. Error           | 95% Confidence Interval for Mean |                      | Minimum | Maximum | Between-Component Variance |
|                |    |         |                |                      | Lower Bound                      | Upper Bound          |         |         |                            |
| 1.00           | 48 | 8.4167  | 10.29115       | 1.48540              | 5.4284                           | 11.4049              | -35.00  | 27.00   |                            |
| 2.00           | 16 | 7.6875  | 9.82323        | 2.45581              | 2.4531                           | 12.9219              | -6.00   | 31.00   |                            |
| 3.00           | 10 | 12.7000 | 10.03383       | 3.17298              | 5.5222                           | 19.8778              | -1.00   | 34.00   |                            |
| Total          | 74 | 8.8378  | 10.14285       | 1.17908              | 6.4879                           | 11.1877              | -35.00  | 34.00   |                            |
| Model          |    |         |                |                      |                                  |                      |         |         |                            |
| Fixed Effects  |    |         | 10.16152       | 1.18125              | 6.4825                           | 11.1932              |         |         |                            |
| Random Effects |    |         |                | 1.18125 <sup>a</sup> | 3.7553 <sup>a</sup>              | 13.9204 <sup>a</sup> |         |         | -.72694                    |

a. Warning: Between-component variance is negative. It was replaced by 0.0 in computing this random effects measure.

| ANOVA          |                |    |             |      |      |
|----------------|----------------|----|-------------|------|------|
| Fin_min_Base   |                |    |             |      |      |
|                | Sum of Squares | df | Mean Square | F    | Sig. |
| Between Groups | 178.850        | 2  | 89.425      | .866 | .425 |
| Within Groups  | 7331.204       | 71 | 103.256     |      |      |
| Total          | 7510.054       | 73 |             |      |      |

Table 23. One-way ANOVA on Fin\_min\_Base with Partake as independent variable

Table 23 shows that the differences among the levels of Partake are not significant ( $F_{(2,71)} = .866$ ,  $p = .425$ ). Therefore, Partake had no influence on Fin\_min\_Base. Entering more robot-tutoring sessions did not improve learning performance.

### 9.4. One-way ANOVA of Advancement on Fin\_min\_Base

To explore the effects of the Advancement on Fin\_min\_Base, we ran the one-way ANOVA.

| Descriptives                             |    |         |                |            |                                  |             |         |         |                            |
|------------------------------------------|----|---------|----------------|------------|----------------------------------|-------------|---------|---------|----------------------------|
| Fin_min_Base                             |    |         |                |            |                                  |             |         |         |                            |
|                                          | N  | Mean    | Std. Deviation | Std. Error | 95% Confidence Interval for Mean |             | Minimum | Maximum | Between-Component Variance |
|                                          |    |         |                |            | Lower Bound                      | Upper Bound |         |         |                            |
| Challenged (Baseline < 22.28)            | 11 | 13.5455 | 12.25858       | 3.69610    | 5.3100                           | 21.7809     | -6.00   | 34.00   |                            |
| Below Average (22.28 < Baseline < 37.16) | 34 | 6.6765  | 9.34108        | 1.60198    | 3.4172                           | 9.9357      | -11.00  | 27.00   |                            |
| Above Average (37.16 < Baseline < 52.04) | 19 | 10.2632 | 6.49651        | 1.49040    | 7.1319                           | 13.3944     | .00     | 21.00   |                            |
| Gifted (Baseline > 52.04)                | 11 | 6.5455  | 15.04236       | 4.53544    | -3.5601                          | 16.6511     | -35.00  | 24.00   |                            |
| Total                                    | 75 | 8.5733  | 10.33123       | 1.19295    | 6.1963                           | 10.9503     | -35.00  | 34.00   |                            |
| Model                                    |    |         |                |            |                                  |             |         |         |                            |
| Fixed Effects                            |    |         | 10.21224       | 1.17921    | 6.2221                           | 10.9246     |         |         |                            |
| Random Effects                           |    |         |                | 1.57733    | 3.5536                           | 13.5931     |         |         | 3.50939                    |

| ANOVA          |                |    |             |       |      |
|----------------|----------------|----|-------------|-------|------|
| Fin_min_Base   |                |    |             |       |      |
|                | Sum of Squares | df | Mean Square | F     | Sig. |
| Between Groups | 493.767        | 3  | 164.589     | 1.578 | .202 |
| Within Groups  | 7404.580       | 71 | 104.290     |       |      |
| Total          | 7898.347       | 74 |             |       |      |

Table 24. One-way ANOVA on Fin\_min\_Base with Advancement as independent variable

In Table 24, the differences among the levels of Advancement are not significant ( $F_{(3,71)} = 1.58$ ,  $p = .202$ ). Therefore, Advancement had no influence on the Fin\_min\_Base. No matter how good children were initially, this did not affect their one-third learning gain on average.

### 9.5. Partake (3) $\times$ Advancement (4) ANOVA on Fin\_min\_Base with Age as covariate

From Section 3.3 and 3.4, we found neither Partake nor Advancement had effect on Fin\_min\_Base. To inspect whether the interaction of Partake and Advancement affected Fin\_min\_Base, we ran a GLM univariate (ANOVA) of Partake (3)  $\times$  Advancement (4) on Fin\_min\_Base with Age as a covariate. Yet, Table 25 shows that the interaction of Partake and Advancement had no significant effect on Fin\_min\_Base.

**Tests of Between-Subjects Effects**

Dependent Variable: Fin\_min\_Base

| Source                | Type III Sum of Squares | df | Mean Square | F     | Sig. | Partial Eta Squared |
|-----------------------|-------------------------|----|-------------|-------|------|---------------------|
| Corrected Model       | 1000.731 <sup>a</sup>   | 11 | 90.976      | .867  | .577 | .133                |
| Intercept             | 365.277                 | 1  | 365.277     | 3.479 | .067 | .053                |
| Age                   | 187.796                 | 1  | 187.796     | 1.789 | .186 | .028                |
| Advancement           | 144.962                 | 3  | 48.321      | .460  | .711 | .022                |
| ParTake               | 93.751                  | 2  | 46.876      | .446  | .642 | .014                |
| Advancement * ParTake | 350.867                 | 5  | 70.173      | .668  | .649 | .051                |
| Error                 | 6509.323                | 62 | 104.989     |       |      |                     |
| Total                 | 13290.000               | 74 |             |       |      |                     |
| Corrected Total       | 7510.054                | 73 |             |       |      |                     |

a. R Squared = .133 (Adjusted R Squared = -.021)

Table 25. Partake (3)  $\times$  Advancement (4) ANOVA on Fin\_min\_Base with Age as a covariate

The conclusions of Section 3.3, 3.4, and 3.5 are consistent: Partake and Advancement had no effect on Fin\_min\_Base. Therefore, every student could benefit from robot tutoring, regardless of their academic performance and the number of times they worked with the robot.

### 9.6. Paired Samples T-test of Partake on Baseline and FinMSco\*

In the above analyses, we did not find effects of Partake on Fin\_min\_Base. It made us assume that one robot intervention is enough and that subsequent sessions are superfluous. To verify this idea, we ran three paired samples t-tests of Partake on Baseline and FinMSco.

**Paired Samples Statistics**

|                            | Mean    | N  | Std. Deviation | Std. Error Mean |
|----------------------------|---------|----|----------------|-----------------|
| Pair 1 Baseline            | 39.7083 | 48 | 15.84897       | 2.28760         |
| Final Multiplication Score | 48.1250 | 48 | 18.78051       | 2.71073         |

**Paired Samples Test**

|        |                                       | Paired Differences |                |                 |                                           | t        | df     | Sig. (2-tailed) |       |
|--------|---------------------------------------|--------------------|----------------|-----------------|-------------------------------------------|----------|--------|-----------------|-------|
|        |                                       | Mean               | Std. Deviation | Std. Error Mean | 95% Confidence Interval of the Difference |          |        |                 |       |
|        |                                       |                    |                |                 | Lower                                     |          |        |                 | Upper |
| Pair 1 | Baseline - Final Multiplication Score | -8.41667           | 10.29115       | 1.48540         | -11.40491                                 | -5.42843 | -5.666 | 47              | .000  |

Table 26. Paired Samples T-test on Baseline and FinMSco as variables with Partake = 1 session

**Paired Samples Statistics**

|                            | Mean    | N  | Std. Deviation | Std. Error Mean |
|----------------------------|---------|----|----------------|-----------------|
| Pair 1 Baseline            | 35.3750 | 16 | 11.80889       | 2.95222         |
| Final Multiplication Score | 43.0625 | 16 | 14.94643       | 3.73661         |

| Paired Samples Test |                                       |                    |                |                 |                                           |          |        |    |                 |
|---------------------|---------------------------------------|--------------------|----------------|-----------------|-------------------------------------------|----------|--------|----|-----------------|
|                     |                                       | Paired Differences |                |                 |                                           |          | t      | df | Sig. (2-tailed) |
|                     |                                       | Mean               | Std. Deviation | Std. Error Mean | 95% Confidence Interval of the Difference |          |        |    |                 |
|                     |                                       |                    |                |                 | Lower                                     | Upper    |        |    |                 |
|                     |                                       |                    |                |                 |                                           |          |        |    |                 |
| Pair 1              | Baseline - Final Multiplication Score | -7.68750           | 9.82323        | 2.45581         | -12.92193                                 | -2.45307 | -3.130 | 15 | .007            |

Table 27. Paired samples t-test on Baseline and FinMSco as variables with Partake = 2 sessions

| Paired Samples Statistics |                            |         |    |                |                 |
|---------------------------|----------------------------|---------|----|----------------|-----------------|
|                           |                            | Mean    | N  | Std. Deviation | Std. Error Mean |
| Pair 1                    | Baseline                   | 28.6364 | 11 | 11.49150       | 3.46482         |
|                           | Final Multiplication Score | 39.1818 | 11 | 12.66348       | 3.81818         |

| Paired Samples Test |                                       |                    |                |                 |                                           |          |        |    |                 |
|---------------------|---------------------------------------|--------------------|----------------|-----------------|-------------------------------------------|----------|--------|----|-----------------|
|                     |                                       | Paired Differences |                |                 |                                           |          | t      | df | Sig. (2-tailed) |
|                     |                                       | Mean               | Std. Deviation | Std. Error Mean | 95% Confidence Interval of the Difference |          |        |    |                 |
|                     |                                       |                    |                |                 | Lower                                     | Upper    |        |    |                 |
| Pair 1              | Baseline - Final Multiplication Score | -10.54545          | 11.90264       | 3.58878         | -18.54175                                 | -2.54916 | -2.938 | 10 | .015            |

Table 28. Paired samples t-test on Baseline and FinMSco as variables with Partake = 3 sessions

We summarised the results of the t-test in Table 29:

| Group       | M <sub>Baseline</sub> | M <sub>FinMSco</sub> | t                  | Sig. (2-tailed) | M <sub>Fin_min_Base</sub> <sup>(1)</sup> | M <sub>Per_Fin_min_Base</sub> <sup>(2)</sup> |
|-------------|-----------------------|----------------------|--------------------|-----------------|------------------------------------------|----------------------------------------------|
| Partake = 1 | 39.71                 | 48.13                | $t_{(48)} = -5.66$ | $p = .000$      | 8.42                                     | 21.20%                                       |
| Partake = 2 | 35.38                 | 43.06                | $t_{(16)} = -3.13$ | $p = .007$      | 7.68                                     | 21.70%                                       |
| Partake = 3 | 28.64                 | 39.18                | $t_{(11)} = -2.94$ | $p = .015$      | 10.54                                    | 36.80%                                       |

(1)  $\text{Fin\_min\_Base} = \text{FinMSco} - \text{Baseline}$

(2)  $\text{Per\_Fin\_Min\_Base} = \text{Fin\_min\_Base} / \text{Baseline}$

Table 29. Improvement after robot tutoring

Counted as the absolute number of correctly answered multiplications, we could see that those who worked with the robot once improved by 8.42 correct. Those who did two sessions had a 7.68 improvement. Those who interacted thrice had a 10.54 improvement. According to Oneway ANOVA (Section 3.3), however, the differences between the number of sessions followed were not significant for Fin\_min\_Base.

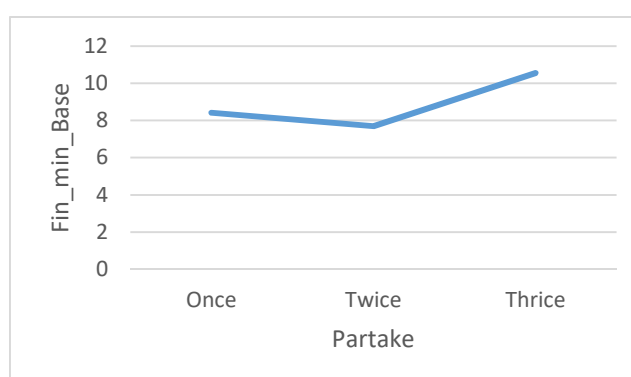

Figure 1. Improvement in absolute number of correct answers: Partake and Fin\_min\_Base

Yet, when we calculated the improvement as a percentage of the Baseline, Partake did exact positive effects on Per\_Fin\_min\_Base (see Section 3.9). Those who had one session with the robot improved 21.20%, those who did two sessions improved with 21.73%, and those who had three sessions gained 36.83%.

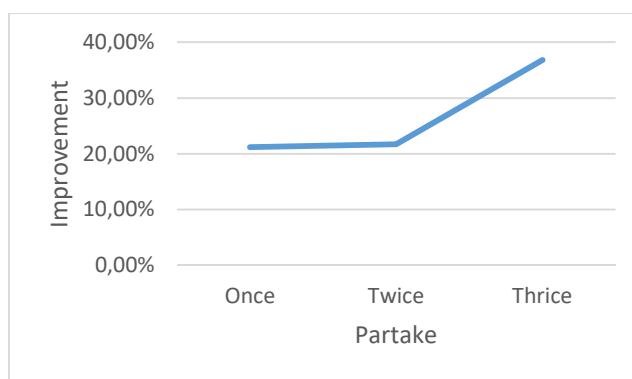

Figure 2. Improvement as a percentage of the Baseline: Partake and Per\_Fin\_min\_Base

### 9.7. Per\_Fin\_min\_Base calculation

In view of Section 3.6, we calculated the percentage of learning gains Per\_Fin\_min\_Base from Fin\_min\_Base / Baseline (Table 29).

| School | Robot | Advancement | Baseline | BasePerf | MuSc1 | MuSc2 | MuSc3 | ParTake | FinMSco | Fin_min_Base | Per_Fin_min_Base | Machine_like |
|--------|-------|-------------|----------|----------|-------|-------|-------|---------|---------|--------------|------------------|--------------|
| 1.00   | 1.00  | 1.0         | 10.00    | 3.00     | 12.00 | -     | -     | 1.00    | 21.00   | 11.00        | 1.10             | 6.00         |
| 2.00   | 1.00  | 1.0         | 22.00    | 2.00     | 7.00  | 7     | -     | 2.00    | 53.00   | 31.00        | 1.41             | 3.00         |
| 2.00   | 1.00  | 1.0         | 17.00    | 3.00     | .00   | 1     | 1.00  | 3.00    | 51.00   | 34.00        | 2.00             | 3.00         |
| 1.00   | 1.00  | 2.0         | 25.00    | 2.00     | 10.00 | -     | -     | 1.00    | 28.00   | 3.00         | .12              | 6.00         |
| 1.00   | 1.00  | 2.0         | 26.00    | 2.00     | 15.00 | -     | -     | 1.00    | 28.00   | 2.00         | .08              | 6.00         |
| 1.00   | 1.00  | 2.0         | 27.00    | 2.00     | 10.00 | -     | -     | 1.00    | 24.00   | -3.00        | -.11             | 6.00         |
| 1.00   | 1.00  | 2.0         | 27.00    | 2.00     | 12.00 | -     | -     | 1.00    | 22.00   | -5.00        | -.19             | 5.00         |
| 1.00   | 1.00  | 2.0         | 28.00    | 2.00     | 13.00 | -     | -     | 1.00    | 27.00   | -1.00        | -.04             | 1.00         |
| 1.00   | 1.00  | 2.0         | 28.00    | 2.00     | 11.00 | -     | -     | 1.00    | 30.00   | 2.00         | .07              | 6.00         |
| 2.00   | 1.00  | 2.0         | 26.00    | 2.00     | 7.00  | 10    | -     | 2.00    | 43.00   | 17.00        | .65              | -            |
| 2.00   | 1.00  | 2.0         | 30.00    | 2.00     | 8.00  | 6     | -     | 2.00    | 27.00   | -3.00        | -.10             | 1.00         |
| 1.00   | 1.00  | 3.0         | 39.00    | 2.00     | 13.00 | -     | -     | 1.00    | 60.00   | 21.00        | .54              | 4.00         |
| 1.00   | 1.00  | 3.0         | 42.00    | 2.00     | 12.00 | -     | -     | 1.00    | 47.00   | 5.00         | .12              | 6.00         |
| 1.00   | 1.00  | 3.0         | 43.00    | 2.00     | 9.00  | -     | -     | 1.00    | 45.00   | 2.00         | .05              | 4.00         |
| 1.00   | 1.00  | 3.0         | 44.00    | 2.00     | 17.00 | -     | -     | 1.00    | 53.00   | 9.00         | .20              | 5.00         |
| 2.00   | 1.00  | 3.0         | 40.00    | 2.00     | .00   | 6     | 2.00  | 3.00    | 47.00   | 7.00         | .18              | 6.00         |
| 2.00   | 1.00  | 3.0         | 42.00    | 2.00     | 12.00 | 2     | 4.00  | 3.00    | 58.00   | 16.00        | .38              | 1.00         |
| 1.00   | 1.00  | 3.0         | 52.00    | 2.00     | 18.00 | -     | -     | 1.00    | 69.00   | 17.00        | .33              | 6.00         |
| 1.00   | 1.00  | 4.0         | 54.00    | 2.00     | 15.00 | -     | -     | 1.00    | 70.00   | 16.00        | .30              | 6.00         |
| 1.00   | 1.00  | 4.0         | 58.00    | 2.00     | 16.00 | -     | -     | 1.00    | 71.00   | 13.00        | .22              | 6.00         |

Table 30. Per\_Fin\_min\_Base calculation

### 9.8. Correlations of Baseline / Partake / Baseline & Partake on Per\_Fin\_min\_Base\*

In Section 3.7, we found significant improvement in the percentage of learning gains. However, we had insufficient information to account for the different improvement caused by Partake since the pupils had a different Baseline (once: 39.85, twice: 35.38, thrice: 28.6). We assumed that the difference may come from the different levels of Baseline with those who had low Baseline learning relatively more. To verify the assumption, we ran correlation analysis on the Baseline and Per\_Fin\_min\_Base (Table 30) and found a significant correlation ( $r = -.530$ ,  $p = .000$ ), indicating that those with poorer Baseline performance learned relatively more as measured by Per\_Fin\_min\_Base.

#### Descriptive Statistics

|                  | Mean    | Std. Deviation | N  |
|------------------|---------|----------------|----|
| Baseline         | 38.0968 | 15.43331       | 62 |
| Per_Fin_min_Base | .3835   | .38453         | 62 |

**Correlations**

|                  |                     | Baseline | Per_Fin_min_Base |
|------------------|---------------------|----------|------------------|
| Baseline         | Pearson Correlation | 1        | -.530**          |
|                  | Sig. (2-tailed)     |          | .000             |
|                  | N                   | 62       | 62               |
| Per_Fin_min_Base | Pearson Correlation | -.530**  | 1                |
|                  | Sig. (2-tailed)     | .000     |                  |
|                  | N                   | 62       | 62               |

\*\* . Correlation is significant at the 0.01 level (2-tailed).

Table 31. Correlation of Baseline and Per\_Fin\_min\_Base

Thus, we observed that both Baseline and Partake contributed to the relative learning gain expressed in percentages (Per\_Fin\_min\_Base). To verify this observation, we ran a Linear Regression Analysis of Baseline and Partake on Per\_Fin\_min\_Base (Table 32).

**Coefficients<sup>a</sup>**

| Model                           | Unstandardized Coefficients |            | Standardized Coefficients | t      | Sig. |
|---------------------------------|-----------------------------|------------|---------------------------|--------|------|
|                                 | B                           | Std. Error | Beta                      |        |      |
| 1 (Constant)                    | .666                        | .156       |                           | 4.262  | .000 |
| Baseline                        | -.012                       | .003       | -.473                     | -4.277 | .000 |
| Number of times Ss participated | .114                        | .057       | .219                      | 1.978  | .053 |

a. Dependent Variable: Per\_Fin\_min\_Base

Table 32. Linear Regression of Baseline and Partake on Per\_Fin\_min\_Base

However, the correlation between Partake and Per\_Fin\_min\_Base was not significant. Therefore, we eliminated the Partake factor and concluded that those with worse Baseline benefited relatively more from the robot tutoring, not necessarily from doing it more often.

### 9.9. One-way ANOVA of Advancement on Per\_Fin\_min\_Base

To strengthen the conclusion that we made in Section 3.8, we ran a One-way ANOVA of Advancement on Per\_Fin\_min\_Base, resulting into Table 33.

**Descriptives**

Per\_Fin\_min\_Base

|                                          | N  | Mean  | Std. Deviation | Std. Error | 95% Confidence Interval for Mean |             | Minimum | Maximum | Between-Component Variance |
|------------------------------------------|----|-------|----------------|------------|----------------------------------|-------------|---------|---------|----------------------------|
|                                          |    |       |                |            | Lower Bound                      | Upper Bound |         |         |                            |
| Challenged (Baseline < 22.28)            | 11 | .7929 | .67497         | .20351     | .3395                            | 1.2464      | -.27    | 2.00    |                            |
| Below Average (22.28 < Baseline < 37.16) | 34 | .2266 | .32832         | .05631     | .1120                            | .3411       | -.46    | .93     |                            |
| Above Average (37.16 < Baseline < 52.04) | 19 | .2233 | .14370         | .03297     | .1540                            | .2925       | .00     | .54     |                            |
| Gifted (Baseline > 52.04)                | 11 | .1089 | .23744         | .07159     | -.0507                           | .2684       | -.54    | .38     |                            |
| Total                                    | 75 | .2915 | .40956         | .04729     | .1973                            | .3858       | -.54    | 2.00    |                            |
| Model                                    |    |       |                |            |                                  |             |         |         |                            |
| Fixed Effects                            |    |       | .35699         | .04122     | .2093                            | .3737       |         |         |                            |
| Random Effects                           |    |       |                | .14068     | -.1562                           | .7392       |         |         | .05785                     |

**ANOVA**

Per\_Fin\_min\_Base

|                | Sum of Squares | df | Mean Square | F     | Sig. |
|----------------|----------------|----|-------------|-------|------|
| Between Groups | 3.364          | 3  | 1.121       | 8.800 | .000 |
| Within Groups  | 9.048          | 71 | .127        |       |      |
| Total          | 12.413         | 74 |             |       |      |

Table 33. One-way ANOVA on Per\_Fin\_min\_Base with Advancement as independent variable

Table 33 shows that the means of Per\_Fin\_min\_Base decrease with the increase of Advancement level (Challenged:  $n = 11$ ,  $M = .80$ ,  $SD = .67$ ; Below Average:  $n = 34$ ,  $M = .23$ ,  $SD = .33$ ; Above Average:  $n = 19$ ,  $M = .22$ ,  $SD = .14$ ; Advanced;  $n = 11$ ,  $M = .11$ ,  $SD = .24$ ). The differences are significant ( $F_{(3,71)} = 8.80$ ,  $p = .000$ ), which is consistent with the results of Section 3.8 that poor students benefited relatively more from robot tutoring than others.

### 9.10. Two-tailed Independent T-tests of Advancement on Per\_Fin\_min\_Base

We ran six two-tailed independent t-tests of Advancement (Challenged - Below Average, Challenged - Above Average, Challenged - Advanced, Below Average – Above Average, Below Average – Advanced, Above Average - Advanced) on Per\_Fin\_min\_Base. Table 34 –Table 39 show the results.

show the results.

| Group Statistics |                                          |    |       |                |                 |  |  |  |  |
|------------------|------------------------------------------|----|-------|----------------|-----------------|--|--|--|--|
| Advancement      |                                          | N  | Mean  | Std. Deviation | Std. Error Mean |  |  |  |  |
| Per_Fin_min_Base | Challenged (Baseline < 22.28)            | 11 | .7929 | .67497         | .20351          |  |  |  |  |
|                  | Below Average (22.28 < Baseline < 37.16) | 34 | .2266 | .32832         | .05631          |  |  |  |  |

| Independent Samples Test |                             |                                         |      |                              |        |                 |                 |                       |                                           |         |
|--------------------------|-----------------------------|-----------------------------------------|------|------------------------------|--------|-----------------|-----------------|-----------------------|-------------------------------------------|---------|
|                          |                             | Levene's Test for Equality of Variances |      | t-test for Equality of Means |        |                 |                 |                       |                                           |         |
|                          |                             | F                                       | Sig. | t                            | df     | Sig. (2-tailed) | Mean Difference | Std. Error Difference | 95% Confidence Interval of the Difference |         |
|                          |                             |                                         |      |                              |        |                 |                 |                       | Lower                                     | Upper   |
| Per_Fin_min_Base         | Equal variances assumed     | 9.231                                   | .004 | 3.759                        | 43     | .001            | .56636          | .15067                | .26251                                    | .87022  |
|                          | Equal variances not assumed |                                         |      | 2.682                        | 11.569 | .021            | .56636          | .21116                | .10438                                    | 1.02834 |

**Group Statistics**

| Advancement      |                                          | N  | Mean  | Std. Deviation | Std. Error Mean |
|------------------|------------------------------------------|----|-------|----------------|-----------------|
| Per_Fin_min_Base | Below Average (22.28 < Baseline < 37.16) | 34 | .2266 | .32832         | .05631          |
|                  | Above Average (37.16 < Baseline < 52.04) | 19 | .2233 | .14370         | .03297          |

**Independent Samples Test**

|                  |                             | Levene's Test for Equality of Variances |      | t-test for Equality of Means |        |                 |                 |                       |                                           |        |
|------------------|-----------------------------|-----------------------------------------|------|------------------------------|--------|-----------------|-----------------|-----------------------|-------------------------------------------|--------|
|                  |                             | F                                       | Sig. | t                            | df     | Sig. (2-tailed) | Mean Difference | Std. Error Difference | 95% Confidence Interval of the Difference |        |
| Per_Fin_min_Base | Equal variances assumed     | 11.545                                  | .001 | .042                         | 51     | .967            | .00330          | .07950                | -.15630                                   | .16290 |
|                  | Equal variances not assumed |                                         |      | .051                         | 48.956 | .960            | .00330          | .06525                | -.12782                                   | .13442 |

Table 37. Independent Sample t-test of Below Average – Above Average on Per\_Fin\_min\_Base

**Group Statistics**

| Advancement      |                                          | N  | Mean  | Std. Deviation | Std. Error Mean |
|------------------|------------------------------------------|----|-------|----------------|-----------------|
| Per_Fin_min_Base | Below Average (22.28 < Baseline < 37.16) | 34 | .2266 | .32832         | .05631          |
|                  | Gifted (Baseline > 52.04)                | 11 | .1089 | .23744         | .07159          |

**Independent Samples Test**

|                  |                             | Levene's Test for Equality of Variances |      | t-test for Equality of Means |        |                 |                 |                       |                                           |        |
|------------------|-----------------------------|-----------------------------------------|------|------------------------------|--------|-----------------|-----------------|-----------------------|-------------------------------------------|--------|
|                  |                             | F                                       | Sig. | t                            | df     | Sig. (2-tailed) | Mean Difference | Std. Error Difference | 95% Confidence Interval of the Difference |        |
| Per_Fin_min_Base | Equal variances assumed     | 3.772                                   | .059 | 1.096                        | 43     | .279            | .11769          | .10738                | -.09887                                   | .33425 |
|                  | Equal variances not assumed |                                         |      | 1.292                        | 23.476 | .209            | .11769          | .09108                | -.07051                                   | .30589 |

Table 38. Independent Sample t-test of Below Average – Advanced on Per\_Fin\_min\_Base

**Group Statistics**

| Advancement      |                                          | N  | Mean  | Std. Deviation | Std. Error Mean |
|------------------|------------------------------------------|----|-------|----------------|-----------------|
| Per_Fin_min_Base | Above Average (37.16 < Baseline < 52.04) | 19 | .2233 | .14370         | .03297          |
|                  | Gifted (Baseline > 52.04)                | 11 | .1089 | .23744         | .07159          |

**Independent Samples Test**

|                  |                             | Levene's Test for Equality of Variances |      | t-test for Equality of Means |        |                 |                 |                       |                                           |        |
|------------------|-----------------------------|-----------------------------------------|------|------------------------------|--------|-----------------|-----------------|-----------------------|-------------------------------------------|--------|
|                  |                             | F                                       | Sig. | t                            | df     | Sig. (2-tailed) | Mean Difference | Std. Error Difference | 95% Confidence Interval of the Difference |        |
| Per_Fin_min_Base | Equal variances assumed     | .328                                    | .572 | 1.652                        | 28     | .110            | .11439          | .06925                | -.02746                                   | .25624 |
|                  | Equal variances not assumed |                                         |      | 1.451                        | 14.333 | .168            | .11439          | .07882                | -.05429                                   | .28307 |

Table 39. Independent Sample t-test of Above Average – Advanced on Per\_Fin\_min\_Base

Table 34 -Table 36 show that the percentage of learning gain (Per\_Fin\_min\_Base) of pupils that are Challenged ( $n = 11$ ,  $M = .79$ ,  $SD = 0.67$ ) was significantly higher than those of level of Below Average ( $n = 34$ ,  $M = .23$ ,  $SD = 0.33$ ), Above Average ( $n = 19$ ,  $M = .22$ ,  $SD = 0.14$ ) or Advanced ( $n = 11$ ,  $M = .11$ ,  $SD = 0.24$ ) (Challenged – Below Average:  $t_{(43)} = 3.76$ ,  $p = .001$ ; Challenged – Above Average:  $t_{(28)} = 3.59$ ,  $p = .001$ ; Challenged – Advanced:  $t_{(20)} = 3.17$ ,  $p = .005$ ). However, Table 37 - Table 39 also show that the differences between Below Average, Above Average and Advanced were not significant (Below Average – Above Average:  $t_{(51)} = .042$ ,  $p = .967$ ; Below Average – Advanced:  $t_{(43)} = 1.10$ ,  $p = .28$ ; Above Average – Advanced:  $t_{(28)} = 1.65$ ,  $p = .11$ ). It indicated that the significant difference of the One-way ANOVA (Section 3.9) came from being Challenged as compared to the other three levels. Thus, extremely poor performers benefited most from robot tutoring.

### 9.11. Conclusion

From the analyses in Section 3, we learned:

- 1) Those with extremely low Baseline benefited relatively more from robot tutoring expressed as a percentage (Per\_Fin\_min\_Base), regardless of the number of sessions they took (Partake).

## 10. Effects of Robot Design, Representation, and Social Role

We analyzed the effect of Robot Design (3)  $\times$  Representation (3)  $\times$  Social Role (6) on children's experience of the robot tutor. We took out those who did not fill out the questionnaire and kept 72 valid cases. To see whether the participants experienced the different robots as the entities they were supposed to resemble (manipulation check), each rated the extent to which they believed their robot resembled a human, an animal, and a machine (i.e. Human-like, Animal-like, and Machine-like).

### 10.1. MANOVA of Robot Design (3) on Human-like, Animal-like, and Machine-like\*

We ran a General Linear Model Multivariate Analysis (MANOVA) of Robot (3) on Human-like, Animal-like, and Machine-like, resulting into Table 40.

| Multivariate Tests <sup>a</sup> |                    |        |                      |               |          |      |                     |
|---------------------------------|--------------------|--------|----------------------|---------------|----------|------|---------------------|
| Effect                          |                    | Value  | F                    | Hypothesis df | Error df | Sig. | Partial Eta Squared |
| Intercept                       | Pillai's Trace     | .936   | 328.109 <sup>b</sup> | 3.000         | 67.000   | .000 | .936                |
|                                 | Wilks' Lambda      | .064   | 328.109 <sup>b</sup> | 3.000         | 67.000   | .000 | .936                |
|                                 | Hotelling's Trace  | 14.691 | 328.109 <sup>b</sup> | 3.000         | 67.000   | .000 | .936                |
|                                 | Roy's Largest Root | 14.691 | 328.109 <sup>b</sup> | 3.000         | 67.000   | .000 | .936                |
| Robot                           | Pillai's Trace     | .460   | 6.779                | 6.000         | 136.000  | .000 | .230                |
|                                 | Wilks' Lambda      | .573   | 7.167 <sup>b</sup>   | 6.000         | 134.000  | .000 | .243                |
|                                 | Hotelling's Trace  | .686   | 7.548                | 6.000         | 132.000  | .000 | .255                |
|                                 | Roy's Largest Root | .586   | 13.288 <sup>c</sup>  | 3.000         | 68.000   | .000 | .370                |

  

| Tests of Between-Subjects Effects |                    |                         |    |             |         |      |                     |
|-----------------------------------|--------------------|-------------------------|----|-------------|---------|------|---------------------|
| Source                            | Dependent Variable | Type III Sum of Squares | df | Mean Square | F       | Sig. | Partial Eta Squared |
| Corrected Model                   | Machine_like       | 4.726 <sup>a</sup>      | 2  | 2.363       | .577    | .564 | .016                |
|                                   | Human_like         | 48.149 <sup>b</sup>     | 2  | 24.075      | 8.321   | .001 | .194                |
|                                   | Animal_like        | 75.646 <sup>c</sup>     | 2  | 37.823      | 12.414  | .000 | .265                |
| Intercept                         | Machine_like       | 1256.264                | 1  | 1256.264    | 306.783 | .000 | .816                |
|                                   | Human_like         | 504.325                 | 1  | 504.325     | 174.316 | .000 | .716                |
|                                   | Animal_like        | 550.737                 | 1  | 550.737     | 180.759 | .000 | .724                |
| Robot                             | Machine_like       | 4.726                   | 2  | 2.363       | .577    | .564 | .016                |
|                                   | Human_like         | 48.149                  | 2  | 24.075      | 8.321   | .001 | .194                |
|                                   | Animal_like        | 75.646                  | 2  | 37.823      | 12.414  | .000 | .265                |
| Error                             | Machine_like       | 282.552                 | 69 | 4.095       |         |      |                     |
|                                   | Human_like         | 199.629                 | 69 | 2.893       |         |      |                     |
|                                   | Animal_like        | 210.229                 | 69 | 3.047       |         |      |                     |
| Total                             | Machine_like       | 1554.000                | 72 |             |         |      |                     |
|                                   | Human_like         | 718.000                 | 72 |             |         |      |                     |
|                                   | Animal_like        | 881.000                 | 72 |             |         |      |                     |
| Corrected Total                   | Machine_like       | 287.278                 | 71 |             |         |      |                     |
|                                   | Human_like         | 247.778                 | 71 |             |         |      |                     |
|                                   | Animal_like        | 285.875                 | 71 |             |         |      |                     |

Table 40. General Linear Model Multivariate Analysis (MANOVA) of Robot (3) on Human-like, Animal-like, and Machine-like

Table 40 shows that pupils judged their robots as significantly different in what they represented: The effects of Robot type on the rating of Representation was significant (Wilks' Lambda = .57,  $F_{(6,134)} = 7.17$ ,  $p < .000$ ,  $\eta^2 = .24$ ). Significant effects were found for Human-like ( $F_{(2,69)} = 8.32$ ,  $p = .001$ ) and Animal-like ( $F_{(2,69)} = 12.41$ ,  $p = .000$ ). Thus, the robots did not differ in their machine-likeness but they did differentiate according to their representation of a human being or an animal.

### 10.2. Two-tailed Independent T-tests of Robot on Human-like and Animal-likeness\*

We ran six two-tailed independent t-tests of Robot Design (Humanoid-Puppy, Humanoid-Droid, and Puppy-Droid) on ratings of Human-like and Animal-likeness. Table 41 –Table 46 show the results.

| Group Statistics |          |    |         |                |                 |  |  |  |  |
|------------------|----------|----|---------|----------------|-----------------|--|--|--|--|
| Robot            |          | N  | Mean    | Std. Deviation | Std. Error Mean |  |  |  |  |
| Human_like       | Humanoid | 19 | 3.89474 | 1.911798       | .438596         |  |  |  |  |
|                  | Puppy    | 26 | 1.88462 | 1.423430       | .279158         |  |  |  |  |

  

| Independent Samples Test |                             |                                         |      |                              |        |                 |                 |                       |                                           |
|--------------------------|-----------------------------|-----------------------------------------|------|------------------------------|--------|-----------------|-----------------|-----------------------|-------------------------------------------|
|                          |                             | Levene's Test for Equality of Variances |      | t-test for Equality of Means |        |                 |                 |                       |                                           |
|                          |                             | F                                       | Sig. | t                            | df     | Sig. (2-tailed) | Mean Difference | Std. Error Difference | 95% Confidence Interval of the Difference |
| Human_like               | Equal variances assumed     | 4.387                                   | .042 | 4.047                        | 43     | .000            | 2.010121        | .496668               | 1.008496 3.011747                         |
|                          | Equal variances not assumed |                                         |      | 3.866                        | 31.782 | .001            | 2.010121        | .519900               | .950836 3.069407                          |

Table 41. Independent Sample t-test of Humanoid - Puppy on Human-likeness

| Group Statistics |          |    |         |                |                 |  |  |  |  |
|------------------|----------|----|---------|----------------|-----------------|--|--|--|--|
| Robot            |          | N  | Mean    | Std. Deviation | Std. Error Mean |  |  |  |  |
| Human_like       | Humanoid | 19 | 3.89474 | 1.911798       | .438596         |  |  |  |  |
|                  | Droid    | 27 | 2.25926 | 1.788695       | .344235         |  |  |  |  |

  

| Independent Samples Test |                             |                                         |      |                              |        |                 |                 |                       |                                           |
|--------------------------|-----------------------------|-----------------------------------------|------|------------------------------|--------|-----------------|-----------------|-----------------------|-------------------------------------------|
|                          |                             | Levene's Test for Equality of Variances |      | t-test for Equality of Means |        |                 |                 |                       |                                           |
|                          |                             | F                                       | Sig. | t                            | df     | Sig. (2-tailed) | Mean Difference | Std. Error Difference | 95% Confidence Interval of the Difference |
| Human_like               | Equal variances assumed     | .168                                    | .684 | 2.968                        | 44     | .005            | 1.635478        | .550998               | .525014 2.745941                          |
|                          | Equal variances not assumed |                                         |      | 2.933                        | 37.227 | .006            | 1.635478        | .557552               | .506002 2.764953                          |

Table 42. Independent Sample t-test of Humanoid - Droid on Human-likeness

| Group Statistics |       |    |         |                |                 |  |  |  |  |
|------------------|-------|----|---------|----------------|-----------------|--|--|--|--|
| Robot            |       | N  | Mean    | Std. Deviation | Std. Error Mean |  |  |  |  |
| Human_like       | Puppy | 26 | 1.88462 | 1.423430       | .279158         |  |  |  |  |
|                  | Droid | 27 | 2.25926 | 1.788695       | .344235         |  |  |  |  |

  

| Independent Samples Test |                             |                                         |      |                              |        |                 |                 |                       |                                           |
|--------------------------|-----------------------------|-----------------------------------------|------|------------------------------|--------|-----------------|-----------------|-----------------------|-------------------------------------------|
|                          |                             | Levene's Test for Equality of Variances |      | t-test for Equality of Means |        |                 |                 |                       |                                           |
|                          |                             | F                                       | Sig. | t                            | df     | Sig. (2-tailed) | Mean Difference | Std. Error Difference | 95% Confidence Interval of the Difference |
| Human_like               | Equal variances assumed     | 3.598                                   | .064 | -.842                        | 51     | .404            | -.374644        | .445119               | -1.268257 .518969                         |
|                          | Equal variances not assumed |                                         |      | -.845                        | 49.278 | .402            | -.374644        | .443200               | -1.265161 .515873                         |

Table 43. Independent Sample t-test of Puppy - Droid on Human-likeness

| Group Statistics |          |    |        |                |                 |  |  |  |  |
|------------------|----------|----|--------|----------------|-----------------|--|--|--|--|
| Robot            |          | N  | Mean   | Std. Deviation | Std. Error Mean |  |  |  |  |
| Animal_like      | Humanoid | 19 | 1.9474 | 1.58021        | .36253          |  |  |  |  |
|                  | Puppy    | 26 | 4.2308 | 1.81786        | .35651          |  |  |  |  |

| Independent Samples Test |                             |                                         |      |                              |        |                 |                 |                       |                                                          |
|--------------------------|-----------------------------|-----------------------------------------|------|------------------------------|--------|-----------------|-----------------|-----------------------|----------------------------------------------------------|
|                          |                             | Levene's Test for Equality of Variances |      | t-test for Equality of Means |        |                 |                 |                       |                                                          |
|                          |                             | F                                       | Sig. | t                            | df     | Sig. (2-tailed) | Mean Difference | Std. Error Difference | 95% Confidence Interval of the Difference<br>Lower Upper |
| Animal_like              | Equal variances assumed     | 2.546                                   | .118 | -4.392                       | 43     | .000            | -2.28340        | .51984                | -3.33176 -1.23504                                        |
|                          | Equal variances not assumed |                                         |      | -4.491                       | 41.622 | .000            | -2.28340        | .50845                | -3.30978 -1.25702                                        |

Table 44. Independent Sample t-test of Humanoid - Puppy on Animal-likeness

| Group Statistics |          |    |        |                |                 |
|------------------|----------|----|--------|----------------|-----------------|
|                  | Robot    | N  | Mean   | Std. Deviation | Std. Error Mean |
| Animal_like      | Humanoid | 19 | 1.9474 | 1.58021        | .36253          |
|                  | Droid    | 27 | 2.2222 | 1.78311        | .34316          |

| Independent Samples Test |                             |                                         |      |                              |        |                 |                 |                       |                                                          |
|--------------------------|-----------------------------|-----------------------------------------|------|------------------------------|--------|-----------------|-----------------|-----------------------|----------------------------------------------------------|
|                          |                             | Levene's Test for Equality of Variances |      | t-test for Equality of Means |        |                 |                 |                       |                                                          |
|                          |                             | F                                       | Sig. | t                            | df     | Sig. (2-tailed) | Mean Difference | Std. Error Difference | 95% Confidence Interval of the Difference<br>Lower Upper |
| Animal_like              | Equal variances assumed     | .967                                    | .331 | -.539                        | 44     | .593            | -.27485         | .50997                | -1.30263 .75292                                          |
|                          | Equal variances not assumed |                                         |      | -.551                        | 41.591 | .585            | -.27485         | .49918                | -1.28254 .73283                                          |

Table 45. Independent Sample t-test of Humanoid - Droid on Animal-likeness

| Group Statistics |       |    |        |                |                 |
|------------------|-------|----|--------|----------------|-----------------|
|                  | Robot | N  | Mean   | Std. Deviation | Std. Error Mean |
| Animal_like      | Puppy | 26 | 4.2308 | 1.81786        | .35651          |
|                  | Droid | 27 | 2.2222 | 1.78311        | .34316          |

| Independent Samples Test |                             |                                         |      |                              |        |                 |                 |                       |                                                          |
|--------------------------|-----------------------------|-----------------------------------------|------|------------------------------|--------|-----------------|-----------------|-----------------------|----------------------------------------------------------|
|                          |                             | Levene's Test for Equality of Variances |      | t-test for Equality of Means |        |                 |                 |                       |                                                          |
|                          |                             | F                                       | Sig. | t                            | df     | Sig. (2-tailed) | Mean Difference | Std. Error Difference | 95% Confidence Interval of the Difference<br>Lower Upper |
| Animal_like              | Equal variances assumed     | .317                                    | .576 | 4.061                        | 51     | .000            | 2.00855         | .49465                | 1.01550 3.00160                                          |
|                          | Equal variances not assumed |                                         |      | 4.059                        | 50.830 | .000            | 2.00855         | .49483                | 1.01505 3.00205                                          |

Table 46. Independent Sample t-test of Puppy - Droid on Animal-likeness

Table 41 shows that the Human-likeness of the Humanoid robot ( $n = 19$ ,  $M = 3.89$ ,  $SD = 1.91$ ) was significantly higher than that of Puppy ( $n = 26$ ,  $M = 1.88$ ,  $SD = 1.42$ ) ( $t_{(43)} = 4.05$ ,  $p = .000$ ). Table 42 shows that the Human-likeness of Humanoid ( $n = 19$ ,  $M = 3.89$ ,  $SD = 1.91$ ) also was significantly higher than that of Droid ( $n = 27$ ,  $M = 2.26$ ,  $SD = 1.79$ ) ( $t_{(44)} = 2.97$ ,  $p = .005$ ). Table 43 shows that the Human-likeness of Puppy ( $n = 26$ ,  $M = 1.88$ ,  $SD = 1.42$ ) and that of Droid ( $n = 27$ ,  $M = 2.26$ ,  $SD = 1.79$ ) did not significantly differ ( $t_{(51)} = -.84$ ,  $p = .40$ ). Table 44 shows that the Animal-likeness of Humanoid ( $n = 19$ ,  $M = 1.95$ ,  $SD = 1.58$ ) was significantly lower than that of Puppy ( $n = 26$ ,  $M = 4.23$ ,  $SD = 1.82$ ) ( $t_{(43)} = -4.39$ ,  $p = .000$ ). Table 45 shows that the Animal-likeness of Humanoid ( $n = 19$ ,  $M = 1.95$ ,  $SD = 1.58$ ) and that of Droid ( $n = 27$ ,  $M = 2.22$ ,  $SD = 1.78$ ) did not significantly differ ( $t_{(44)} = -.54$ ,  $p = .59$ ). Table 46 shows that the Animal-likeness of Puppy ( $n = 26$ ,  $M = 4.23$ ,  $SD = 1.82$ ) was significantly higher than that of Droid ( $n = 27$ ,  $M = 2.22$ ,  $SD = 1.78$ ) ( $t_{(51)} = 4.06$ ,  $p = .000$ ). Therefore, Humanoid was rated as more human-like and Puppy was more animal-like, whereas for Droid, no differences were significant. Thus, all robots were machine-like with Droid as the starting point, while Puppy added an animalistic and Humanoid a more human impression.

### 10.3. Regression of Human-like, Animal-like, and Machine-like on Fin\_min\_Base / Per\_Fin\_min\_Base

To check whether the students' perceptions of the Representation (Human-like, Animal-like, and Machine-like) had an effect on learning (i.e. Fin\_min\_Base), we did regression analysis of Human-like, Animal-like, and Machine-like on Fin\_min\_Base and Per\_Fin\_min\_Base, respectively (Table

47-48). However, no significant relationship was established with Fin\_min\_Base (Human-like:  $t = -.47$ ,  $p = .64$ ; Animal-like:  $t = -.52$ ,  $p = .61$ ; Machine-like:  $t = -.50$ ,  $p = .62$ ), nor with Per\_Fin\_min\_Base (Human-like:  $t = -.26$ ,  $p = .80$ ; Animal-like:  $t = -1.16$ ,  $p = .25$ ; Machine-like:  $t = -.71$ ,  $p = .48$ ).

Coefficients<sup>a</sup>

| Model |              | Unstandardized Coefficients |            | Standardized Coefficients | t     | Sig. |
|-------|--------------|-----------------------------|------------|---------------------------|-------|------|
|       |              | B                           | Std. Error | Beta                      |       |      |
| 1     | (Constant)   | 11.882                      | 4.808      |                           | 2.471 | .016 |
|       | Machine_like | -.339                       | .674       | -.065                     | -.503 | .617 |
|       | Human_like   | -.327                       | .696       | -.059                     | -.469 | .640 |
|       | Animal_like  | -.343                       | .663       | -.066                     | -.517 | .607 |

a. Dependent Variable: Fin\_min\_Base

Table 47. Regression of Representation on Fin\_min\_Base

Coefficients<sup>a</sup>

| Model |              | Unstandardized Coefficients |            | Standardized Coefficients | t      | Sig. |
|-------|--------------|-----------------------------|------------|---------------------------|--------|------|
|       |              | B                           | Std. Error | Beta                      |        |      |
| 1     | (Constant)   | .478                        | .189       |                           | 2.524  | .014 |
|       | Machine_like | -.019                       | .027       | -.092                     | -.712  | .479 |
|       | Human_like   | -.007                       | .027       | -.032                     | -.256  | .799 |
|       | Animal_like  | -.030                       | .026       | -.147                     | -1.159 | .250 |

Table 48. Regression of Representation on Per\_Fin\_min\_Base

Combined with the results from Sections 4.2 and 4.3, students perceived the robot as we expected but their perception had no effect on learning gains; not in absolute numbers of correct answers and not as a percentage of improvement from the Baseline. Thus, the design of the embodiment did not matter for learning multiplication tables.

#### 10.4. MANOVA of Social Role on Human-like, Animal-like, and Machine-like, separately\*

We ran three GLM Multivariate Analyses (MANOVA) of Social Role (Friend, Classmate, Teacher, Acquaintance, Stranger) on Human-like, Animal-like, and Machine-like as separate dependents for effects to become significant easily. Results are in Table 49 – 51.

Multivariate Tests<sup>a</sup>

| Effect     |                    | Value | F                   | Hypothesis df | Error df | Sig. |
|------------|--------------------|-------|---------------------|---------------|----------|------|
| Intercept  | Pillai's Trace     | .771  | 34.158 <sup>b</sup> | 6.000         | 61.000   | .000 |
|            | Wilks' Lambda      | .229  | 34.158 <sup>b</sup> | 6.000         | 61.000   | .000 |
|            | Hotelling's Trace  | 3.360 | 34.158 <sup>b</sup> | 6.000         | 61.000   | .000 |
|            | Roy's Largest Root | 3.360 | 34.158 <sup>b</sup> | 6.000         | 61.000   | .000 |
| Human_like | Pillai's Trace     | .402  | .948                | 30.000        | 325.000  | .548 |
|            | Wilks' Lambda      | .648  | .938                | 30.000        | 246.000  | .563 |
|            | Hotelling's Trace  | .468  | .927                | 30.000        | 297.000  | .580 |
|            | Roy's Largest Root | .205  | 2.218 <sup>c</sup>  | 6.000         | 65.000   | .052 |

a. Design: Intercept + Human\_like

b. Exact statistic

c. The statistic is an upper bound on F that yields a lower bound on the significance level.

Table 49. GLM Multivariate Analysis (MANOVA) of Social Role on ratings of Human-like

Table 49 shows that the different Social Roles are not significant for Human-likeness ( $F_{(30,246)} = .94$ ,  $p = .563$ ).

**Multivariate Tests<sup>a</sup>**

| Effect      |                    | Value | F                   | Hypothesis df | Error df | Sig. |
|-------------|--------------------|-------|---------------------|---------------|----------|------|
| Intercept   | Pillai's Trace     | .872  | 68.957 <sup>b</sup> | 6.000         | 61.000   | .000 |
|             | Wilks' Lambda      | .128  | 68.957 <sup>b</sup> | 6.000         | 61.000   | .000 |
|             | Hotelling's Trace  | 6.783 | 68.957 <sup>b</sup> | 6.000         | 61.000   | .000 |
|             | Roy's Largest Root | 6.783 | 68.957 <sup>b</sup> | 6.000         | 61.000   | .000 |
| Animal_like | Pillai's Trace     | .491  | 1.180               | 30.000        | 325.000  | .242 |
|             | Wilks' Lambda      | .584  | 1.180               | 30.000        | 246.000  | .246 |
|             | Hotelling's Trace  | .591  | 1.170               | 30.000        | 297.000  | .253 |
|             | Roy's Largest Root | .284  | 3.080 <sup>c</sup>  | 6.000         | 65.000   | .010 |

a. Design: Intercept + Animal\_like

b. Exact statistic

c. The statistic is an upper bound on F that yields a lower bound on the significance level.

Table 50. GLM Multivariate Analysis (MANOVA) of Social Role on ratings of Animal-like

Table 50 shows that Social Roles had no significant effect on Animal-likeness ( $F_{(30,246)} = 1.18$ ,  $p = .246$ ).

**Multivariate Tests<sup>a</sup>**

| Effect       |                    | Value | F                   | Hypothesis df | Error df | Sig. |
|--------------|--------------------|-------|---------------------|---------------|----------|------|
| Intercept    | Pillai's Trace     | .883  | 76.811 <sup>b</sup> | 6.000         | 61.000   | .000 |
|              | Wilks' Lambda      | .117  | 76.811 <sup>b</sup> | 6.000         | 61.000   | .000 |
|              | Hotelling's Trace  | 7.555 | 76.811 <sup>b</sup> | 6.000         | 61.000   | .000 |
|              | Roy's Largest Root | 7.555 | 76.811 <sup>b</sup> | 6.000         | 61.000   | .000 |
| Machine_like | Pillai's Trace     | .639  | 1.587               | 30.000        | 325.000  | .029 |
|              | Wilks' Lambda      | .462  | 1.746               | 30.000        | 246.000  | .012 |
|              | Hotelling's Trace  | .959  | 1.899               | 30.000        | 297.000  | .004 |
|              | Roy's Largest Root | .710  | 7.693 <sup>c</sup>  | 6.000         | 65.000   | .000 |

a. Design: Intercept + Machine\_like

b. Exact statistic

c. The statistic is an upper bound on F that yields a lower bound on the significance level.

**Tests of Between-Subjects Effects**

| Source          | Dependent Variable | Type III Sum of Squares | df | Mean Square | F       | Sig. |
|-----------------|--------------------|-------------------------|----|-------------|---------|------|
| Corrected Model | Friend             | 25.961 <sup>a</sup>     | 5  | 5.192       | 1.267   | .289 |
|                 | Classmate          | 14.997 <sup>b</sup>     | 5  | 2.999       | 1.062   | .389 |
|                 | Teacher            | 45.313 <sup>c</sup>     | 5  | 9.063       | 2.752   | .026 |
|                 | Acquaintance       | 3.138 <sup>d</sup>      | 5  | .628        | .302    | .910 |
|                 | Stranger           | 7.509 <sup>e</sup>      | 5  | 1.502       | .417    | .835 |
|                 | Machine            | 93.856 <sup>f</sup>     | 5  | 18.771      | 5.527   | .000 |
| Intercept       | Friend             | 357.622                 | 1  | 357.622     | 87.263  | .000 |
|                 | Classmate          | 246.676                 | 1  | 246.676     | 87.378  | .000 |
|                 | Teacher            | 372.274                 | 1  | 372.274     | 113.049 | .000 |
|                 | Acquaintance       | 147.410                 | 1  | 147.410     | 70.857  | .000 |
|                 | Stranger           | 263.867                 | 1  | 263.867     | 73.244  | .000 |
|                 | Machine            | 360.315                 | 1  | 360.315     | 106.096 | .000 |
| Machine_like    | Friend             | 25.961                  | 5  | 5.192       | 1.267   | .289 |
|                 | Classmate          | 14.997                  | 5  | 2.999       | 1.062   | .389 |
|                 | Teacher            | 45.313                  | 5  | 9.063       | 2.752   | .026 |
|                 | Acquaintance       | 3.138                   | 5  | .628        | .302    | .910 |
|                 | Stranger           | 7.509                   | 5  | 1.502       | .417    | .835 |
|                 | Machine            | 93.856                  | 5  | 18.771      | 5.527   | .000 |

Table 51. GLM Multivariate Analysis (MANOVA) of Social Role on ratings of Machine-like

Table 51 shows that the different Social Roles were significant for Machine-likeness ( $F_{(30,246)} = 1.75$ ,  $p = .012$ ). Between-subject effects indicated that the effect of Teacher ( $F_{(5,66)} = 2.75$ ,  $p = .026$ ) and the effect of Machine ( $F_{(5,66)} = 5.53$ ,  $p = .000$ ) on Machine-likeness were significant. However, there are six dependent variables in the analysis so that the rejection area should be corrected, according to Bonferroni ( $.05 / 6 = .0083$ ). Hence, only the categorization as Machine ( $F_{(5,66)} = 5.53$ ,  $p = .000$ ) exerted significant effects on Machine-likeness, indicating that students perceived a machine-like robot indeed as a machine.

### 10.5. Conclusion

From the analyses in Section 4, we found:

- 1) The pupils perceived the robot as intended (manipulation successful).
- 2) The social role they attributed to the robots had no significant effect on their perceptions of human, animal, or machine-likeness, except that the role of 'machine' indeed raised significant machine-likeness, which is a trivial finding.

## 11. Reliability Analysis of Questionnaire Items (# = 43)

In this section, we scrutinize the convergent and divergent validity of measuring the experiential factors.

### 11.1. Recoding Counter-indicative Items

The counter-indicative items on the questionnaire were recoded into new variables (1→6, 2→5, 3→4, 4→3, 5→2, 6→1). Items Eng\_3, Eng\_5, Anth\_1, Anth\_4, Real\_3, Rel\_3, Aff\_3, Aff\_4, Use\_Int\_2 were recoded into Eng\_3CR, Eng\_5CR, Anth\_1CR, Anth\_4CR, Real\_3CR, Rel\_3CR, Aff\_3CR, Aff\_4CR, and Use\_Int\_2CR.

### 11.2. Convergent Validity

For the test on convergent validity (do items on a scale measure the same construct?) we calculated Cronbach's Alpha. For divergent validity (do items on different scales not measure the same construct?), we did Principal Component Analysis (PCA).

#### 11.2.1. Engagement scale

We ran reliability analysis on Engagement (5 items) and found that Cronbach's Alpha = .79. The result was high enough to confirm that the scale of Engagement is reliable.

| Reliability Statistics |                                              |            |
|------------------------|----------------------------------------------|------------|
| Cronbach's Alpha       | Cronbach's Alpha Based on Standardized Items | N of Items |
| .785                   | .791                                         | 5          |

Table 52. Convergent Validity of Engagement

#### 11.2.2. Bonding scale

We ran reliability analysis on Bonding (5 items) and found that Cronbach's Alpha = .88. The result was high enough that we could say the reliability of the scale of Bonding was reliable.

**Reliability Statistics**

| Cronbach's Alpha | Cronbach's Alpha Based on Standardized Items | N of Items |
|------------------|----------------------------------------------|------------|
| .876             | .877                                         | 5          |

Table 53. Convergent Validity of Bonding

**11.2.3. Anthropomorphism scale**

We ran reliability analysis on Anthropomorphism and found Cronbach's Alpha to be very low (.34). We enhanced the reliability by taking out Anth\_4CR (Table 54).

**Reliability Statistics**

| Cronbach's Alpha | Cronbach's Alpha Based on Standardized Items | N of Items |
|------------------|----------------------------------------------|------------|
| .335             | .334                                         | 4          |

**Item-Total Statistics**

|          | Scale Mean if Item Deleted | Scale Variance if Item Deleted | Corrected Item-Total Correlation | Squared Multiple Correlation | Cronbach's Alpha if Item Deleted |
|----------|----------------------------|--------------------------------|----------------------------------|------------------------------|----------------------------------|
| Anth_1CR | 10.4493                    | 14.810                         | .177                             | .056                         | .274                             |
| Anth_2   | 11.5507                    | 10.839                         | .433                             | .478                         | -.077 <sup>a</sup>               |
| Anth_3   | 11.5942                    | 12.568                         | .286                             | .478                         | .135                             |
| Anth_4CR | 11.1014                    | 18.622                         | -.112                            | .064                         | .574                             |

a. The value is negative due to a negative average covariance among items. This violates reliability model assumptions. You may want to check item codings.

Table 54. Convergent Validity of Anthropomorphism

After taking out the Anth\_4CR, we ran the analysis again and got Table 55.

**Reliability Statistics**

| Cronbach's Alpha | Cronbach's Alpha Based on Standardized Items | N of Items |
|------------------|----------------------------------------------|------------|
| .574             | .562                                         | 3          |

**Item-Total Statistics**

|          | Scale Mean if Item Deleted | Scale Variance if Item Deleted | Corrected Item-Total Correlation | Squared Multiple Correlation | Cronbach's Alpha if Item Deleted |
|----------|----------------------------|--------------------------------|----------------------------------|------------------------------|----------------------------------|
| Anth_1CR | 6.6522                     | 13.613                         | .121                             | .040                         | .807                             |
| Anth_2   | 7.7536                     | 7.747                          | .604                             | .478                         | .088                             |
| Anth_3   | 7.7971                     | 8.752                          | .490                             | .463                         | .297                             |

Table 55. Convergent Validity of Anthropomorphism after dismissing Anth\_4CR

The reliability of Anthropomorphism still was not satisfactory (Cronbach's Alpha = .57). We could further improve the reliability by taking out Anth\_1CR (Table 55). However, because there were only two items left on the scale, we calculated Spearman-Brown Correlation ( $r = .68$ ,  $p = .000$ ) and got the results of Table 56.

| Correlations   |        |                         | Anth_2 | Anth_3 |
|----------------|--------|-------------------------|--------|--------|
| Spearman's rho | Anth_2 | Correlation Coefficient | 1.000  | .684** |
|                |        | Sig. (2-tailed)         | .      | .000   |
|                |        | N                       | 69     | 69     |
|                | Anth_3 | Correlation Coefficient | .684** | 1.000  |
|                |        | Sig. (2-tailed)         | .000   | .      |
|                |        | N                       | 69     | 70     |

\*\* . Correlation is significant at the 0.01 level (2-tailed).

Table 56. Spearman-Brown Correlation with Anth\_2 and Anth\_3

The items Anth\_2 and Anth\_3 were significantly correlated ( $r = .68$ ,  $p = .000$ ).

#### 11.2.4. Realism scale

We ran reliability analysis on Realism and found Cronbach's Alpha to be low (.37). We enhanced the reliability by taking out Real\_3CR (Table 57).

| Reliability Statistics |                                              |            |
|------------------------|----------------------------------------------|------------|
| Cronbach's Alpha       | Cronbach's Alpha Based on Standardized Items | N of Items |
| .367                   | .287                                         | 4          |

  

| Item-Total Statistics |                            |                                |                                  |                              |                                  |
|-----------------------|----------------------------|--------------------------------|----------------------------------|------------------------------|----------------------------------|
|                       | Scale Mean if Item Deleted | Scale Variance if Item Deleted | Corrected Item-Total Correlation | Squared Multiple Correlation | Cronbach's Alpha if Item Deleted |
| Real_1                | 10.6377                    | 11.646                         | .420                             | .295                         | .016                             |
| Real_2                | 10.5507                    | 10.780                         | .438                             | .372                         | -.035 <sup>a</sup>               |
| Real_3CR              | 9.1159                     | 25.516                         | -.393                            | .177                         | .752                             |
| Real_4                | 10.5652                    | 11.043                         | .510                             | .519                         | -.100 <sup>a</sup>               |

a. The value is negative due to a negative average covariance among items. This violates reliability model assumptions. You may want to check item codings.

Table 57. Convergent Validity of Realism

After taking out Real\_3CR, we ran the analysis again and found that the reliability of Realism (3 items) improved (Cronbach's Alpha = .75).

**Reliability Statistics**

| Cronbach's Alpha | Cronbach's Alpha Based on Standardized Items | N of Items |
|------------------|----------------------------------------------|------------|
| .752             | .754                                         | 3          |

Table 58. Convergent Validity of Realism without Real\_3CR

**11.2.5. Relevance scale**

We ran reliability analysis on Relevance and found that Cronbach's Alpha = .73. The result shows that the reliability of the items was positive.

**Reliability Statistics**

| Cronbach's Alpha | Cronbach's Alpha Based on Standardized Items | N of Items |
|------------------|----------------------------------------------|------------|
| .734             | .728                                         | 4          |

Table 59. Convergent Validity of Relevance

**11.2.6. Affordance scale**

We ran reliability analysis on Affordance and found that Cronbach's Alpha was very low (.13). We enhanced the reliability by taking out Aff\_3CR (Table 60).

**Reliability Statistics**

| Cronbach's Alpha | Cronbach's Alpha Based on Standardized Items | N of Items |
|------------------|----------------------------------------------|------------|
| .128             | .066                                         | 4          |

**Item-Total Statistics**

|         | Scale Mean if Item Deleted | Scale Variance if Item Deleted | Corrected Item-Total Correlation | Squared Multiple Correlation | Cronbach's Alpha if Item Deleted |
|---------|----------------------------|--------------------------------|----------------------------------|------------------------------|----------------------------------|
| Aff_1   | 13.6000                    | 7.287                          | .229                             | .414                         | -.259 <sup>a</sup>               |
| Aff_2   | 13.9714                    | 8.289                          | .181                             | .445                         | -.132 <sup>a</sup>               |
| Aff_3CR | 12.8286                    | 13.130                         | -.086                            | .275                         | .271                             |
| Aff_4CR | 12.7000                    | 13.662                         | -.098                            | .307                         | .265                             |

a. The value is negative due to a negative average covariance among items. This violates reliability model assumptions. You may want to check item codings.

Table 60. Convergent Validity of Affordance

After taking out Aff\_3CR, we ran the analysis again and obtained the results of Table 61.

**Reliability Statistics**

| Cronbach's Alpha | Cronbach's Alpha Based on Standardized Items | N of Items |
|------------------|----------------------------------------------|------------|
| .271             | .078                                         | 3          |

**Item-Total Statistics**

|         | Scale Mean if Item Deleted | Scale Variance if Item Deleted | Corrected Item-Total Correlation | Squared Multiple Correlation | Cronbach's Alpha if Item Deleted |
|---------|----------------------------|--------------------------------|----------------------------------|------------------------------|----------------------------------|
| Aff_1   | 8.7286                     | 4.201                          | .485                             | .404                         | -.911 <sup>a</sup>               |
| Aff_2   | 9.1000                     | 5.280                          | .392                             | .445                         | -.494 <sup>a</sup>               |
| Aff_4CR | 7.8286                     | 14.405                         | -.304                            | .113                         | .776                             |

a. The value is negative due to a negative average covariance among items. This violates reliability model assumptions. You may want to check item codings.

Table 61. Convergent Validity of Affordance after taking Aff\_3CR out

However, Affordances remained unreliable (Cronbach's Alpha = .27). We could further improve the reliability by taking out Aff\_4CR (Table 61). However, because there were only two items left on the scale, we calculated Spearman-Brown Correlation and got the result of Table 62.

**Correlations**

|                |       |                         | Aff_1  | Aff_2  |
|----------------|-------|-------------------------|--------|--------|
| Spearman's rho | Aff_1 | Correlation Coefficient | 1.000  | .610** |
|                |       | Sig. (2-tailed)         | .      | .000   |
|                |       | N                       | 71     | 70     |
|                | Aff_2 | Correlation Coefficient | .610** | 1.000  |
|                |       | Sig. (2-tailed)         | .000   | .      |
|                |       | N                       | 70     | 70     |

\*\* . Correlation is significant at the 0.01 level (2-tailed).

Table 62. Spearman-Brown Correlation between Aff\_1 and Aff\_2

Aff\_1 and Aff\_2 were significantly correlated ( $r = .61, p = .000$ ).

### 11.2.7. Use Intentions scale

We ran reliability analysis on Use Intentions (3 items) and found Cronbach's Alpha = .63. Although reliability was not too high, we still kept the scale intact to enter the analysis of divergence.

**Reliability Statistics**

| Cronbach's Alpha | Cronbach's Alpha Based on Standardized Items | N of Items |
|------------------|----------------------------------------------|------------|
| .629             | .615                                         | 3          |

Table 63. Convergent Validity of Use Intentions

In the analyses of 5.2.1 up to 5.2.7, we removed the variables of Eng\_1-5, Bon\_1-5, Rel\_1-4, Anth\_2, Anth\_3, Real\_1, Real\_2, Real\_4, Aff\_1, Aff\_2, Use\_Int\_1-3. The remaining items were tested for divergence.

### 11.3. Divergent Validity: PCA

As the indicators of each factor were chosen beforehand, we executed a *Principal Component Analysis* or PCA, forcing the items into a 7-factor solution. Because we expected that all factors would correlate, we used the *Direct Oblimin* method. *Maximum Iterations for convergence* was set to 25, coefficients under .30 were disregarded, and the number of factors were based on the *Kaisers Criterium* (>1). Results are in Table 64.

Component Matrix<sup>a</sup>

|         | Component |       |       |      |       |       |       |
|---------|-----------|-------|-------|------|-------|-------|-------|
|         | 1         | 2     | 3     | 4    | 5     | 6     | 7     |
| Eng_1   | .677      | .327  |       |      |       | -.306 |       |
| Eng_2   | .739      | .300  |       |      |       |       |       |
| Eng_3CR | .329      | .665  | .366  |      |       | .354  |       |
| Eng_4   | .773      |       |       |      |       |       |       |
| Eng_5CR | .337      | .722  |       |      | .355  |       |       |
| Bon_1   | .679      |       | -.332 |      | .410  |       |       |
| Bon_2   | .757      |       |       |      |       |       |       |
| Bon_3   | .772      |       |       |      | .318  |       |       |
| Bon_4   | .803      |       |       |      |       |       |       |
| Bon_5   | .658      |       |       | .437 |       |       |       |
| Anth_2  | .701      | -.305 |       |      |       |       |       |
| Anth_3  | .768      |       |       |      |       |       |       |
| Real_1  | .699      |       |       |      |       | .377  | -.320 |
| Real_2  | .693      |       |       |      |       |       |       |
| Real_4  | .720      |       |       |      |       |       | .313  |
| Rel_1   | .732      |       |       |      | -.308 |       |       |
| Rel_2   | .715      |       | .337  |      |       |       |       |
| Rel_3CR | .308      |       | .687  |      |       |       |       |

|             |      |       |      |       |       |       |  |
|-------------|------|-------|------|-------|-------|-------|--|
| Rel_4       | .501 | -.393 | .389 |       |       |       |  |
| Aff_1       | .691 |       |      |       | -.309 |       |  |
| Aff_2       | .703 |       |      | -.302 |       |       |  |
| Use_Int_1   | .694 |       |      |       | .305  |       |  |
| Use_int_2CR |      |       | .689 |       |       |       |  |
| Use_Int_3   | .765 |       |      | -.352 |       | -.316 |  |

Extraction Method: Principal Component Analysis.

a. 7 components extracted.

**Total Variance Explained**

| Component | Extraction Sums of Squared Loadings |               |              | Rotation Sums of Squared Loadings |               |              |
|-----------|-------------------------------------|---------------|--------------|-----------------------------------|---------------|--------------|
|           | Total                               | % of Variance | Cumulative % | Total                             | % of Variance | Cumulative % |
| 1         | 10.560                              | 44.001        | 44.001       | 10.389                            | 43.288        | 43.288       |
| 2         | 1.970                               | 8.210         | 52.211       | 2.024                             | 8.434         | 51.723       |
| 3         | 1.916                               | 7.982         | 60.193       | 1.864                             | 7.767         | 59.489       |
| 4         | 1.276                               | 5.317         | 65.510       | 1.338                             | 5.574         | 65.063       |
| 5         | 1.009                               | 4.203         | 69.713       | 1.116                             | 4.650         | 69.713       |

Extraction Method: Principal Component Analysis.

**Component Matrix<sup>a</sup>**

|             | Component |      |      |      |      |
|-------------|-----------|------|------|------|------|
|             | 1         | 2    | 3    | 4    | 5    |
| Eng_1       | .677      |      |      |      |      |
| Eng_2       | .739      |      |      |      |      |
| Eng_3CR     |           | .665 |      |      |      |
| Eng_4       | .773      |      |      |      |      |
| Eng_5CR     |           | .722 |      |      |      |
| Bon_1       | .679      |      |      |      | .410 |
| Bon_2       | .757      |      |      |      |      |
| Bon_3       | .772      |      |      |      |      |
| Bon_4       | .803      |      |      |      |      |
| Bon_5       | .658      |      |      | .437 |      |
| Anth_2      | .701      |      |      |      |      |
| Anth_3      | .768      |      |      |      |      |
| Real_1      | .699      |      |      |      |      |
| Real_2      | .693      |      |      |      |      |
| Real_4      | .720      |      |      |      |      |
| Rel_1       | .732      |      |      |      |      |
| Rel_2       | .715      |      |      |      |      |
| Rel_3CR     |           |      | .687 |      |      |
| Rel_4       | .501      |      |      |      |      |
| Aff_1       | .691      |      |      |      |      |
| Aff_2       | .703      |      |      |      |      |
| Use_Int_1   | .694      |      |      |      |      |
| Use_int_2CR |           |      | .689 |      |      |
| Use_Int_3   | .765      |      |      |      |      |

Table 64. Divergent validity of the experiential items in a 7-factor and 5-factor solution

The 7-factor solution showed that all items loaded on factor 1 with the two counter-indicative items of Engagement loading on factor 2 but with a lot of ‘smear’ to other components. Two other items formed a third component but they came from Relevance and Use Intentions. Because theoretically (Konijn & Hoorn, 2017), Bonding is the result of Anthropomorphism, Relevance, Realism, and Affordances and because Engagement and Use intentions were mere ‘back-ups,’ we reasoned that the bulk of the items sided with Bonding as the central component.

To give it another try, we reasoned that in a forced 5-factor solution, the two support scales Engagement and Use intentions should fall in line with Bonding, whereas the other theoretical variables should form their own component. The Total Variance Explained shows the actual five factors that were extracted while the Rotated Component Matrix shows the factor loadings of each variable. Almost all experiential items loaded on factor 1, the only scale remaining intact being Bonding (5 items). Again, factor 2 consisted of two Engagement items. Although the Spearman-Brown Correlation between Eng\_3CR and Eng\_5CR was significant, it was not very high (.51) (Table 65). And again, factor 3 was a combination of two items from different scales (Rel\_3CR and Use\_int\_2CR).

Correlations

|                |         |                         | Eng_3CR | Eng_5CR |
|----------------|---------|-------------------------|---------|---------|
| Spearman's rho | Eng_3CR | Correlation Coefficient | 1.000   | .513**  |
|                |         | Sig. (2-tailed)         | .       | .000    |
|                |         | N                       | 70      | 69      |
|                | Eng_5CR | Correlation Coefficient | .513**  | 1.000   |
|                |         | Sig. (2-tailed)         | .000    | .       |
|                |         | N                       | 69      | 70      |

\*\* . Correlation is significant at the 0.01 level (2-tailed).

Table 65. Spearman-Brown Correlation of Eng\_3CR and Eng\_5CR

All in all, divergent validity of the questionnaire items was weak and the only scale having good measurement quality overall was Bonding (5 items, Cronbach's  $\alpha = .88$ ), which will be the experiential factor we use for further analysis.

#### 11.4. GLM Repeated Measures of Robot Design $\times$ Advancement with Mbond as covar

H3 expected that emotional bonding with the robot would positively affect the learning outcomes in a mediating or moderating way. We computed Mbond by calculating the average over Bon\_1 to Bon\_5. To examine H3, we ran the previous GLM Repeated Measures again of Robot Design (3)  $\times$  Advancement Level (4) (between-subjects) on the (within-subjects) number of equations correctly solved before and after robot tutoring with Mbond as the covariate. However, Mbond exerted no significant main or interaction effects on the multiplication scores and the earlier pattern of results was not altered.

| Multivariate Tests <sup>a</sup> |                    |       |                   |               |          |      |                     |
|---------------------------------|--------------------|-------|-------------------|---------------|----------|------|---------------------|
| Effect                          |                    | Value | F                 | Hypothesis df | Error df | Sig. | Partial Eta Squared |
| BeforeAfter * Mbond             | Pillai's Trace     | .000  | .012 <sup>b</sup> | 1,000         | 57,000   | .912 | .000                |
|                                 | Wilks' Lambda      | 1,000 | .012 <sup>b</sup> | 1,000         | 57,000   | .912 | .000                |
|                                 | Hotelling's Trace  | .000  | .012 <sup>b</sup> | 1,000         | 57,000   | .912 | .000                |
|                                 | Roy's Largest Root | .000  | .012 <sup>b</sup> | 1,000         | 57,000   | .912 | .000                |

### Tests of Within-Subjects Contrasts

Measure: MEASURE\_1

| Source                            | BeforeAfter | Type III Sum of Squares | df | Mean Square | F      | Sig. | Partial Eta Squared |
|-----------------------------------|-------------|-------------------------|----|-------------|--------|------|---------------------|
| BeforeAfter                       | Linear      | 607,079                 | 1  | 607,079     | 14,698 | ,000 | ,205                |
| BeforeAfter * Mbond               | Linear      | ,504                    | 1  | ,504        | ,012   | ,912 | ,000                |
| BeforeAfter * Robot               | Linear      | 124,672                 | 2  | 62,336      | 1,509  | ,230 | ,050                |
| BeforeAfter * Advancement         | Linear      | 289,499                 | 3  | 96,500      | 2,336  | ,083 | ,109                |
| BeforeAfter * Robot * Advancement | Linear      | 990,164                 | 6  | 165,027     | 3,995  | ,002 | ,296                |
| Error(BeforeAfter)                | Linear      | 2354,353                | 57 | 41,304      |        |      |                     |

### Tests of Between-Subjects Effects

Measure: MEASURE\_1

Transformed Variable: Average

| Source              | Type III Sum of Squares | df | Mean Square | F       | Sig. | Partial Eta Squared |
|---------------------|-------------------------|----|-------------|---------|------|---------------------|
| Intercept           | 49974,367               | 1  | 49974,367   | 642,835 | ,000 | ,919                |
| Mbond               | 15,595                  | 1  | 15,595      | ,201    | ,656 | ,004                |
| Robot               | 342,804                 | 2  | 171,402     | 2,205   | ,120 | ,072                |
| Advancement         | 24738,026               | 3  | 8246,009    | 106,071 | ,000 | ,848                |
| Robot * Advancement | 882,142                 | 6  | 147,024     | 1,891   | ,098 | ,166                |
| Error               | 4431,214                | 57 | 77,741      |         |      |                     |

We then ran a Univariate Analysis of Variance (ANOVA) of Robot Design and Advancement Level directly on Mbond. Not all children who took the multiplication test also filled out the questionnaire, therefore  $N = 70$ . The intercept was significantly different from zero so that Bonding tendencies did occur ( $F_{(1,58)} = 194.76$ ,  $p = .000$ ,  $\eta_p^2 = .77$ ). However, none of the main effects or interaction was significant ( $F < 1$ ). Robot Design nor Advancement Level exerted significant effects on Mbond.

### Tests of Between-Subjects Effects

Dependent Variable: Mbond

| Source              | Type III Sum of Squares | df | Mean Square | F       | Sig. | Partial Eta Squared |
|---------------------|-------------------------|----|-------------|---------|------|---------------------|
| Corrected Model     | 13,425 <sup>a</sup>     | 11 | 1,220       | ,407    | ,947 | ,072                |
| Intercept           | 583,657                 | 1  | 583,657     | 194,755 | ,000 | ,771                |
| Robot               | 1,045                   | 2  | ,522        | ,174    | ,840 | ,006                |
| Advancement         | 7,952                   | 3  | 2,651       | ,884    | ,455 | ,044                |
| Robot * Advancement | 4,052                   | 6  | ,675        | ,225    | ,967 | ,023                |
| Error               | 173,819                 | 58 | 2,997       |         |      |                     |
| Total               | 914,320                 | 70 |             |         |      |                     |
| Corrected Total     | 187,243                 | 69 |             |         |      |                     |

a. R Squared = .072 (Adjusted R Squared = -.104)

#### 11.5. ANOVA School (2) × Robot Design (3) × Gender (2) × Advancement (4) on Mbond\*

We conducted an ANOVA of School (2) × Robot (3) × Gender (2) × Advancement level (4) on Mbond, showing that only the difference in School was significant ( $F_{(1,34)} = 4.57$ ,  $p = .04$ ) (Table 66).

### Tests of Between-Subjects Effects

Dependent Variable: Mbond

| Source                                | Type III Sum of Squares | df | Mean Square | F       | Sig. |
|---------------------------------------|-------------------------|----|-------------|---------|------|
| Corrected Model                       | 88.792 <sup>a</sup>     | 35 | 2.537       | .876    | .651 |
| Intercept                             | 353.792                 | 1  | 353.792     | 122.181 | .000 |
| Robot                                 | 1.231                   | 2  | .616        | .213    | .810 |
| School                                | 13.243                  | 1  | 13.243      | 4.574   | .040 |
| Gender                                | .000                    | 1  | .000        | .000    | .995 |
| Advancement                           | 3.177                   | 3  | 1.059       | .366    | .778 |
| Robot * School                        | .075                    | 2  | .037        | .013    | .987 |
| Robot * Gender                        | .134                    | 2  | .067        | .023    | .977 |
| Robot * Advancement                   | 8.293                   | 6  | 1.382       | .477    | .820 |
| School * Gender                       | 2.183                   | 1  | 2.183       | .754    | .391 |
| School * Advancement                  | 21.699                  | 3  | 7.233       | 2.498   | .076 |
| Gender * Advancement                  | 7.086                   | 3  | 2.362       | .816    | .494 |
| Robot * School * Gender               | .984                    | 1  | .984        | .340    | .564 |
| Robot * School * Advancement          | 3.653                   | 4  | .913        | .315    | .866 |
| Robot * Gender * Advancement          | 8.025                   | 3  | 2.675       | .924    | .440 |
| School * Gender * Advancement         | .055                    | 1  | .055        | .019    | .892 |
| Robot * School * Gender * Advancement | .000                    | 0  | .           | .       | .    |
| Error                                 | 98.451                  | 34 | 2.896       |         |      |
| Total                                 | 914.320                 | 70 |             |         |      |
| Corrected Total                       | 187.243                 | 69 |             |         |      |

Table 66. School (2) × Robot (3) × Gender (2) × Advancement (4) ANOVA on Mbond

### 11.6. Independent Samples T-test of School on Mbond \*

We ran an independent samples t-test of School on Mbond and got the results of Table 67.

#### Group Statistics

| School |               | N  | Mean   | Std. Deviation | Std. Error Mean |
|--------|---------------|----|--------|----------------|-----------------|
| Mbond  | Good Shepherd | 48 | 3.6000 | 1.63941        | .23663          |
|        | Chun Lei      | 22 | 2.4000 | 1.36626        | .29129          |

#### Independent Samples Test

|       |                             | Levene's Test for Equality of Variances |      | t-test for Equality of Means |        |                 |                 |                       |                                           |         |
|-------|-----------------------------|-----------------------------------------|------|------------------------------|--------|-----------------|-----------------|-----------------------|-------------------------------------------|---------|
|       |                             | F                                       | Sig. | t                            | df     | Sig. (2-tailed) | Mean Difference | Std. Error Difference | 95% Confidence Interval of the Difference |         |
|       |                             |                                         |      |                              |        |                 |                 |                       | Lower                                     | Upper   |
| Mbond | Equal variances assumed     | 1.847                                   | .179 | 2.987                        | 68     | .004            | 1.20000         | .40169                | .39845                                    | 2.00155 |
|       | Equal variances not assumed |                                         |      | 3.198                        | 48.437 | .002            | 1.20000         | .37529                | .44561                                    | 1.95439 |

Table 67. Independent Samples t-test on Mbond with School as variable

The difference between Schools was significant ( $t_{(68)} = 2.99$ ,  $p = .004$ ), Good Shepherd showing higher mean Bonding than Chun Lei. The main difference between the schools was that Good Shepherd partook but once in the tutoring sessions and Chun Lei more than once (factor Partake).

### 11.7. Independent Samples T-test of Partake on Mbond \*

We ran three t-tests with Partake as the grouping variable (once – twice, once – thrice, twice – thrice) and obtained the results tabulated in Table 68 up to Table 70.

| Group Statistics |  |                                 |    |        |                |                 |  |  |  |  |
|------------------|--|---------------------------------|----|--------|----------------|-----------------|--|--|--|--|
|                  |  | Number of times Ss participated | N  | Mean   | Std. Deviation | Std. Error Mean |  |  |  |  |
| Mbond            |  | 1.00                            | 48 | 3.6000 | 1.63941        | .23663          |  |  |  |  |
|                  |  | 2.00                            | 14 | 2.1857 | 1.14882        | .30703          |  |  |  |  |

  

| Independent Samples Test |                             |                                         |      |                              |        |                 |                 |                       |                                           |         |
|--------------------------|-----------------------------|-----------------------------------------|------|------------------------------|--------|-----------------|-----------------|-----------------------|-------------------------------------------|---------|
|                          |                             | Levene's Test for Equality of Variances |      | t-test for Equality of Means |        |                 |                 |                       |                                           |         |
|                          |                             | F                                       | Sig. | t                            | df     | Sig. (2-tailed) | Mean Difference | Std. Error Difference | 95% Confidence Interval of the Difference |         |
|                          |                             |                                         |      |                              |        |                 |                 |                       | Lower                                     | Upper   |
| Mbond                    | Equal variances assumed     | 3.045                                   | .086 | 3.011                        | 60     | .004            | 1.41429         | .46971                | .47473                                    | 2.35384 |
|                          | Equal variances not assumed |                                         |      | 3.648                        | 30.093 | .001            | 1.41429         | .38764                | .62273                                    | 2.20584 |

Table 68. Independent samples t-test with Once and Twice on Mbond

| Group Statistics |  |                                 |    |        |                |                 |  |  |  |  |
|------------------|--|---------------------------------|----|--------|----------------|-----------------|--|--|--|--|
|                  |  | Number of times Ss participated | N  | Mean   | Std. Deviation | Std. Error Mean |  |  |  |  |
| Mbond            |  | 1.00                            | 48 | 3.6000 | 1.63941        | .23663          |  |  |  |  |
|                  |  | 3.00                            | 8  | 2.7750 | 1.70189        | .60171          |  |  |  |  |

  

| Independent Samples Test |                             |                                         |      |                              |       |                 |                 |                       |                                           |         |
|--------------------------|-----------------------------|-----------------------------------------|------|------------------------------|-------|-----------------|-----------------|-----------------------|-------------------------------------------|---------|
|                          |                             | Levene's Test for Equality of Variances |      | t-test for Equality of Means |       |                 |                 |                       |                                           |         |
|                          |                             | F                                       | Sig. | t                            | df    | Sig. (2-tailed) | Mean Difference | Std. Error Difference | 95% Confidence Interval of the Difference |         |
|                          |                             |                                         |      |                              |       |                 |                 |                       | Lower                                     | Upper   |
| Mbond                    | Equal variances assumed     | .002                                    | .965 | 1.311                        | 54    | .195            | .82500          | .62920                | -.43648                                   | 2.08648 |
|                          | Equal variances not assumed |                                         |      | 1.276                        | 9.299 | .233            | .82500          | .64657                | -.63048                                   | 2.28048 |

Table 69. Independent samples t-test with Once and Thrice on Mbond

| Group Statistics |  |                                 |    |        |                |                 |  |  |  |  |
|------------------|--|---------------------------------|----|--------|----------------|-----------------|--|--|--|--|
|                  |  | Number of times Ss participated | N  | Mean   | Std. Deviation | Std. Error Mean |  |  |  |  |
| Mbond            |  | 2.00                            | 14 | 2.1857 | 1.14882        | .30703          |  |  |  |  |
|                  |  | 3.00                            | 8  | 2.7750 | 1.70189        | .60171          |  |  |  |  |

  

| Independent Samples Test |                             |                                         |      |                              |        |                 |                 |                       |                                           |        |
|--------------------------|-----------------------------|-----------------------------------------|------|------------------------------|--------|-----------------|-----------------|-----------------------|-------------------------------------------|--------|
|                          |                             | Levene's Test for Equality of Variances |      | t-test for Equality of Means |        |                 |                 |                       |                                           |        |
|                          |                             | F                                       | Sig. | t                            | df     | Sig. (2-tailed) | Mean Difference | Std. Error Difference | 95% Confidence Interval of the Difference |        |
|                          |                             |                                         |      |                              |        |                 |                 |                       | Lower                                     | Upper  |
| Mbond                    | Equal variances assumed     | 1.793                                   | .196 | -.972                        | 20     | .343            | -.58929         | .60633                | -1.85407                                  | .67550 |
|                          | Equal variances not assumed |                                         |      | -.872                        | 10.728 | .402            | -.58929         | .67552                | -2.08070                                  | .90213 |

Table 70. Independent samples t-test with Twice and Thrice on Mbond

The effects on Mbond of Once and Thrice and that of Twice and Thrice are not significant (Once – Thrice:  $t_{(54)} = 1.31$ ,  $p = .20$ ; Twice – Thrice:  $t_{(20)} = .97$ ,  $p = .34$ ). However, the difference between Once and Twice is significant for Mbond (Once – Twice:  $t_{(60)} = 3.01$ ,  $p = .004$ ), even if is corrected to .017, using Bonferroni. Mean Bonding became less after first encounter ( $M_1 = 3.60$ ,  $SD = 1.64$ ;  $M_2 = 2.19$ ;  $SD = 1.70$ ), which is due to Chun Lei pupils alone. The insignificant different with those encountering the robot thrice might come from a lack of statistical power ( $n = 11$ ).

We wondered if the high bonding upon first encounter was due to a novelty effect, wearing off after multiple encounters. Therefore, we did correlation analysis on Novelty and Mbond (Table 71).

| Correlations |                     |        |        |
|--------------|---------------------|--------|--------|
|              |                     | Mbond  | Nov_1  |
| Mbond        | Pearson Correlation | 1      | .309** |
|              | Sig. (2-tailed)     |        | .010   |
|              | N                   | 70     | 69     |
| Nov_1        | Pearson Correlation | .309** | 1      |
|              | Sig. (2-tailed)     | .010   |        |
|              | N                   | 69     | 70     |

\*\* . Correlation is significant at the 0.01 level (2-tailed).

Table 71. Correlation between Novelty and Mbond

We found that the correlation was significant but not very high ( $r = .31$ ,  $p = .01$ ). Children from Chun Lei saw the robot more often so that less novelty may have led to lower bonding.

### 11.8. Correlation between Mbond and Fin\_min\_Base and with Per\_Fin\_min\_Base

We ran a two-tailed bivariate correlation analysis between Mbond and Fin\_min\_Base and between Mbond and Per\_Fin\_min\_Base.

| Correlations |                     |              |       |
|--------------|---------------------|--------------|-------|
|              |                     | Fin_min_Base | Mbond |
| Fin_min_Base | Pearson Correlation | 1            | .007  |
|              | Sig. (2-tailed)     |              | .951  |
|              | N                   | 72           | 70    |
| Mbond        | Pearson Correlation | .007         | 1     |
|              | Sig. (2-tailed)     | .951         |       |
|              | N                   | 70           | 70    |

Table 72. Correlation between Mbond and Fin\_min\_Base

| Correlations     |                     |                  |       |
|------------------|---------------------|------------------|-------|
|                  |                     | Per_Fin_min_Base | Mbond |
| Per_Fin_min_Base | Pearson Correlation | 1                | -.076 |
|                  | Sig. (2-tailed)     |                  | .531  |
|                  | N                   | 72               | 70    |
| Mbond            | Pearson Correlation | -.076            | 1     |
|                  | Sig. (2-tailed)     | .531             |       |
|                  | N                   | 70               | 70    |

Table 73. Correlation between Mbond and Per\_Fin\_min\_Base

Table 72 and Table 73 show that neither the correlation between Mbond and Fin\_min\_Base ( $r = .007$ ,  $p = .951$ ) nor that between Mbond and Per\_Fin\_min\_Base ( $r = -.076$ ,  $p = .531$ ) were significant, implying Mbond had no relation to learning gain in whatever form.

### 11.9. Conclusion

From the analyses of Section 5, we found:

- 1) Only the Bonding scale was psychometrically reliable,
- 2) Bonding had no significant relation with learning gain.
- 3) The Good Shepherd children experienced more bonding probably in view of a novelty effect

## 12. Overview of the factors on Fin\_min\_Base and Mbond

### 12.1. MANOVA of School (2) × Robot (3) × Gender (2) × Advancement (4) on Fin\_min\_Base, Per\_Fin\_min\_Base, and Mbond with Age, Novelty, and Aesthetics as covariates

We conducted a GLM Multivariate Analysis (MANOVA) of School (2) × Robot Design (3) × Gender (2) × Advancement level (4) on Fin\_min\_Base and Mbond and on Per\_Fin\_min\_Base and Mbond with Age, Nov\_1, Aest\_1 as covariates.

Tests of Between-Subjects Effects

| Source          | Dependent Variable | Type III Sum of Squares | df | Mean Square | F      | Sig. |
|-----------------|--------------------|-------------------------|----|-------------|--------|------|
| Corrected Model | Fin_min_Base       | 4758.161 <sup>a</sup>   | 38 | 125.215     | 1.510  | .124 |
|                 | Per_Fin_min_Base   | 9.538 <sup>b</sup>      | 38 | .251        | 3.793  | .000 |
|                 | Mbond              | 126.024 <sup>c</sup>    | 38 | 3.316       | 1.651  | .080 |
| Intercept       | Fin_min_Base       | 98.695                  | 1  | 98.695      | 1.190  | .284 |
|                 | Per_Fin_min_Base   | .077                    | 1  | .077        | 1.160  | .290 |
|                 | Mbond              | 1.238                   | 1  | 1.238       | .617   | .438 |
| Nov_1           | Fin_min_Base       | 133.125                 | 1  | 133.125     | 1.605  | .215 |
|                 | Per_Fin_min_Base   | .055                    | 1  | .055        | .825   | .371 |
|                 | Mbond              | 2.363                   | 1  | 2.363       | 1.177  | .287 |
| Aest_1          | Fin_min_Base       | 57.003                  | 1  | 57.003      | .687   | .414 |
|                 | Per_Fin_min_Base   | .026                    | 1  | .026        | .391   | .536 |
|                 | Mbond              | 26.520                  | 1  | 26.520      | 13.205 | .001 |
| Age             | Fin_min_Base       | 38.572                  | 1  | 38.572      | .465   | .500 |
|                 | Per_Fin_min_Base   | .017                    | 1  | .017        | .250   | .621 |
|                 | Mbond              | .227                    | 1  | .227        | .113   | .739 |
| School          | Fin_min_Base       | 27.615                  | 1  | 27.615      | .333   | .568 |
|                 | Per_Fin_min_Base   | .017                    | 1  | .017        | .263   | .612 |
|                 | Mbond              | 4.896                   | 1  | 4.896       | 2.438  | .129 |
| Robot           | Fin_min_Base       | 304.470                 | 2  | 152.235     | 1.836  | .177 |
|                 | Per_Fin_min_Base   | .802                    | 2  | .401        | 6.056  | .006 |
|                 | Mbond              | .774                    | 2  | .387        | .193   | .826 |

|                                       |                  |           |    |         |       |      |
|---------------------------------------|------------------|-----------|----|---------|-------|------|
| Advancement                           | Fin_min_Base     | 69.835    | 3  | 23.278  | .281  | .839 |
|                                       | Per_Fin_min_Base | .817      | 3  | .272    | 4.115 | .015 |
|                                       | Mbond            | 1.903     | 3  | .634    | .316  | .814 |
| Gender                                | Fin_min_Base     | 15.064    | 1  | 15.064  | .182  | .673 |
|                                       | Per_Fin_min_Base | .004      | 1  | .004    | .063  | .804 |
|                                       | Mbond            | .837      | 1  | .837    | .417  | .524 |
| School * Robot                        | Fin_min_Base     | 188.014   | 2  | 94.007  | 1.133 | .335 |
|                                       | Per_Fin_min_Base | .009      | 2  | .005    | .071  | .932 |
|                                       | Mbond            | 1.529     | 2  | .765    | .381  | .687 |
| School * Advancement                  | Fin_min_Base     | 295.762   | 3  | 98.587  | 1.189 | .331 |
|                                       | Per_Fin_min_Base | .269      | 3  | .090    | 1.354 | .276 |
|                                       | Mbond            | 1.668     | 3  | .556    | .277  | .842 |
| School * Gender                       | Fin_min_Base     | 3.727     | 1  | 3.727   | .045  | .834 |
|                                       | Per_Fin_min_Base | .007      | 1  | .007    | .112  | .740 |
|                                       | Mbond            | .269      | 1  | .269    | .134  | .717 |
| Robot * Advancement                   | Fin_min_Base     | 1161.560  | 6  | 193.593 | 2.334 | .057 |
|                                       | Per_Fin_min_Base | 1.646     | 6  | .274    | 4.145 | .004 |
|                                       | Mbond            | 14.118    | 6  | 2.353   | 1.172 | .347 |
| Robot * Gender                        | Fin_min_Base     | .446      | 2  | .223    | .003  | .997 |
|                                       | Per_Fin_min_Base | .000      | 2  | .000    | .004  | .996 |
|                                       | Mbond            | 1.533     | 2  | .766    | .382  | .686 |
| Advancement * Gender                  | Fin_min_Base     | 320.295   | 3  | 106.765 | 1.287 | .297 |
|                                       | Per_Fin_min_Base | .345      | 3  | .115    | 1.738 | .180 |
|                                       | Mbond            | 5.721     | 3  | 1.907   | .950  | .429 |
| School * Robot * Advancement          | Fin_min_Base     | 375.706   | 4  | 93.926  | 1.132 | .360 |
|                                       | Per_Fin_min_Base | .210      | 4  | .052    | .792  | .539 |
|                                       | Mbond            | 1.204     | 4  | .301    | .150  | .962 |
| School * Robot * Gender               | Fin_min_Base     | 534.201   | 1  | 534.201 | 6.441 | .017 |
|                                       | Per_Fin_min_Base | .633      | 1  | .633    | 9.558 | .004 |
|                                       | Mbond            | .273      | 1  | .273    | .136  | .715 |
| School * Advancement * Gender         | Fin_min_Base     | 199.238   | 1  | 199.238 | 2.402 | .132 |
|                                       | Per_Fin_min_Base | .242      | 1  | .242    | 3.660 | .065 |
|                                       | Mbond            | .211      | 1  | .211    | .105  | .748 |
| Robot * Advancement * Gender          | Fin_min_Base     | 335.869   | 3  | 111.956 | 1.350 | .277 |
|                                       | Per_Fin_min_Base | .285      | 3  | .095    | 1.436 | .252 |
|                                       | Mbond            | 9.985     | 3  | 3.328   | 1.657 | .197 |
| School * Robot * Advancement * Gender | Fin_min_Base     | .000      | 0  | .       | .     | .    |
|                                       | Per_Fin_min_Base | .000      | 0  | .       | .     | .    |
|                                       | Mbond            | .000      | 0  | .       | .     | .    |
| Error                                 | Fin_min_Base     | 2488.129  | 30 | 82.938  |       |      |
|                                       | Per_Fin_min_Base | 1.985     | 30 | .066    |       |      |
|                                       | Mbond            | 60.251    | 30 | 2.008   |       |      |
| Total                                 | Fin_min_Base     | 12710.000 | 69 |         |       |      |
|                                       | Per_Fin_min_Base | 17.982    | 69 |         |       |      |
|                                       | Mbond            | 896.680   | 69 |         |       |      |
| Corrected Total                       | Fin_min_Base     | 7246.290  | 68 |         |       |      |
|                                       | Per_Fin_min_Base | 11.523    | 68 |         |       |      |
|                                       | Mbond            | 186.275   | 68 |         |       |      |

a. R Squared = .657 (Adjusted R Squared = .222)

b. R Squared = .828 (Adjusted R Squared = .609)

c. R Squared = .677 (Adjusted R Squared = .267)

Table 74. School (2)  $\times$  Robot Design (3)  $\times$  Gender (2)  $\times$  Advancement (4) MANOVA on Fin\_min\_Base and Per\_Fin\_min\_Base together with Mbond with Age, Nov\_1, Aest\_1 as covariates

Table 74 shows that the following effects were significant:

- (1) the interaction of School  $\times$  Robot Design  $\times$  Gender on Fin\_min\_Base ( $F_{(1,30)} = 6.44, p = .017$ )

However, Section 2.2 and 2.3 showed that none of the contrasts in the factors School, Robot, and Gender were significant so that (1) can be considered a false positive.

- (2) the interaction of School  $\times$  Robot Design  $\times$  Gender on Per\_Fin\_min\_Base ( $F_{(1,30)} = 9.56, p = .004$ )

To scrutinize the contrasts of the factor Robot, we ran three independent samples t-tests of Robot on Per\_Fin\_min\_Base. Table 76 – 78 show that none of the differences were significant (Humanoid – Puppy:  $t_{(43)} = .14, p = .89$ ; Humanoid – Droid:  $t_{(44)} = 1.03, p = .31$ ; Puppy – Droid:  $t_{(51)} = 1.18, p = .24$ ). Table 79 and 80 show that neither the difference between School ( $t_{(70)} = -1.23, p = .22$ ) nor that between Gender ( $t_{(70)} = .13, p = .90$ ) was significant. We conclude that the significant F-value for the interaction came from the accumulation of noise in the contrasts.

- (3) the interaction of Advancement  $\times$  Robot Design on Per\_Fin\_min\_Base ( $F_{(6,30)} = 4.15, p = .004$ ) as produced by

- (4) the main effect of Robot Design on Per\_Fin\_min\_Base ( $F_{(2,30)} = 6.06, p = .006$ )

As said in (2), the contrasts of the factor Robot were not significant. The inconsistency between ANOVA and t-test indicates the propagation of noise from a set of non-significant contrasts, resulting in a false-positive for the F-value

- (5) and the main effect of Advancement on Per\_Fin\_min\_Base ( $F_{(3,30)} = 4.12, p = .015$ )

As shown in Section 3.8, a significant positive correlation occurred between Advancement and Per\_Fin\_min\_Base and in Section 3.9, we saw a significant effect of Advancement on Per\_Fin\_min\_Base, indicating that Per\_Fin\_min\_Base decreased with the increase of Advancement. The t-test in Section 10, however, revealed that the significance effect is due to the level of being Challenged compared to the other three levels. With higher Advancement, pupils beyond being Challenged statistically did not obtain more learning gains.

- (6) Aest\_1 covaried with Mbond ( $F_{(1,71)} = 13.21, p = .001$ ), indicating that the experience of ‘prettier’ led to stronger bonding tendencies as supported by a two-tailed bivariate correlation analysis ( $r = .56, p = .000$ ) (Table 75).

## Correlations

|        |                     | Mbond  | Aest_1 |
|--------|---------------------|--------|--------|
| Mbond  | Pearson Correlation | 1      | .561** |
|        | Sig. (2-tailed)     |        | .000   |
|        | N                   | 70     | 69     |
| Aest_1 | Pearson Correlation | .561** | 1      |
|        | Sig. (2-tailed)     | .000   |        |
|        | N                   | 69     | 71     |

\*\* . Correlation is significant at the 0.01 level (2-tailed).

Table 75. Correlation between Aest\_1 and Mbond

## Group Statistics

|                  |          | Robot | N  | Mean  | Std. Deviation | Std. Error Mean |
|------------------|----------|-------|----|-------|----------------|-----------------|
| Per_Fin_min_Base | Humanoid |       | 19 | .3504 | .56347         | .12927          |
|                  | Puppy    |       | 26 | .3306 | .39127         | .07673          |

## Independent Samples Test

|                  |                             | Levene's Test for Equality of Variances |      | t-test for Equality of Means |        |                 |                 |                       |                                           |        |
|------------------|-----------------------------|-----------------------------------------|------|------------------------------|--------|-----------------|-----------------|-----------------------|-------------------------------------------|--------|
|                  |                             | F                                       | Sig. | t                            | df     | Sig. (2-tailed) | Mean Difference | Std. Error Difference | 95% Confidence Interval of the Difference |        |
|                  |                             |                                         |      |                              |        |                 |                 |                       | Lower                                     | Upper  |
| Per_Fin_min_Base | Equal variances assumed     | .782                                    | .381 | .139                         | 43     | .890            | .01982          | .14218                | -.26691                                   | .30655 |
|                  | Equal variances not assumed |                                         |      | .132                         | 30.219 | .896            | .01982          | .15033                | -.28710                                   | .32674 |

Table 76. Independent samples t-test of Humanoid and Puppy on Per\_Fin\_min\_Base

## Group Statistics

|                  |          | Robot | N  | Mean  | Std. Deviation | Std. Error Mean |
|------------------|----------|-------|----|-------|----------------|-----------------|
| Per_Fin_min_Base | Humanoid |       | 19 | .3504 | .56347         | .12927          |
|                  | Droid    |       | 27 | .2179 | .30065         | .05786          |

## Independent Samples Test

|                  |                             | Levene's Test for Equality of Variances |      | t-test for Equality of Means |        |                 |                 |                       |                                           |        |
|------------------|-----------------------------|-----------------------------------------|------|------------------------------|--------|-----------------|-----------------|-----------------------|-------------------------------------------|--------|
|                  |                             | F                                       | Sig. | t                            | df     | Sig. (2-tailed) | Mean Difference | Std. Error Difference | 95% Confidence Interval of the Difference |        |
|                  |                             |                                         |      |                              |        |                 |                 |                       | Lower                                     | Upper  |
| Per_Fin_min_Base | Equal variances assumed     | 3.330                                   | .075 | 1.034                        | 44     | .307            | .13253          | .12820                | -.12585                                   | .39091 |
|                  | Equal variances not assumed |                                         |      | .936                         | 25.234 | .358            | .13253          | .14163                | -.15902                                   | .42408 |

Table 77. Independent samples t-test of Humanoid and Droid on Per\_Fin\_min\_Base

## Group Statistics

|                  |       | Robot | N  | Mean  | Std. Deviation | Std. Error Mean |
|------------------|-------|-------|----|-------|----------------|-----------------|
| Per_Fin_min_Base | Puppy |       | 26 | .3306 | .39127         | .07673          |
|                  | Droid |       | 27 | .2179 | .30065         | .05786          |

## Independent Samples Test

|                  |                             | Levene's Test for Equality of Variances |      | t-test for Equality of Means |        |                 |                 |                       |                                           |        |
|------------------|-----------------------------|-----------------------------------------|------|------------------------------|--------|-----------------|-----------------|-----------------------|-------------------------------------------|--------|
|                  |                             | F                                       | Sig. | t                            | df     | Sig. (2-tailed) | Mean Difference | Std. Error Difference | 95% Confidence Interval of the Difference |        |
|                  |                             |                                         |      |                              |        |                 |                 |                       | Lower                                     | Upper  |
| Per_Fin_min_Base | Equal variances assumed     | 1.650                                   | .205 | 1.179                        | 51     | .244            | .11271          | .09563                | -.07927                                   | .30470 |
|                  | Equal variances not assumed |                                         |      | 1.173                        | 46.925 | .247            | .11271          | .09610                | -.08063                                   | .30606 |

Table 78. Independent samples t-test of Puppy and Droid on Per\_Fin\_min\_Base

| Group Statistics |               |    |       |                |                 |  |  |  |  |  |
|------------------|---------------|----|-------|----------------|-----------------|--|--|--|--|--|
| School           |               | N  | Mean  | Std. Deviation | Std. Error Mean |  |  |  |  |  |
| Per_Fin_min_Base | Good Shepherd | 48 | .2512 | .31030         | .04479          |  |  |  |  |  |
|                  | Chun Lei      | 24 | .3781 | .56574         | .11548          |  |  |  |  |  |

  

| Independent Samples Test |                             |                                         |      |                              |        |                 |                 |                       |                                           |        |
|--------------------------|-----------------------------|-----------------------------------------|------|------------------------------|--------|-----------------|-----------------|-----------------------|-------------------------------------------|--------|
|                          |                             | Levene's Test for Equality of Variances |      | t-test for Equality of Means |        |                 |                 |                       |                                           |        |
|                          |                             | F                                       | Sig. | t                            | df     | Sig. (2-tailed) | Mean Difference | Std. Error Difference | 95% Confidence Interval of the Difference |        |
|                          |                             |                                         |      |                              |        |                 |                 |                       | Lower                                     | Upper  |
| Per_Fin_min_Base         | Equal variances assumed     | 8.772                                   | .004 | -1.231                       | 70     | .222            | -.12686         | .10302                | -.33233                                   | .07861 |
|                          | Equal variances not assumed |                                         |      | -1.024                       | 30.106 | .314            | -.12686         | .12386                | -.37978                                   | .12606 |

Table 79. Independent samples t-test of School on Per\_Fin\_min\_Base

| Group Statistics |        |    |       |                |                 |  |  |  |  |  |
|------------------|--------|----|-------|----------------|-----------------|--|--|--|--|--|
| Gender           |        | N  | Mean  | Std. Deviation | Std. Error Mean |  |  |  |  |  |
| Per_Fin_min_Base | Male   | 42 | .2988 | .39024         | .06022          |  |  |  |  |  |
|                  | Female | 30 | .2862 | .45096         | .08233          |  |  |  |  |  |

  

| Independent Samples Test |                             |                                         |      |                              |        |                 |                 |                       |                                           |        |
|--------------------------|-----------------------------|-----------------------------------------|------|------------------------------|--------|-----------------|-----------------|-----------------------|-------------------------------------------|--------|
|                          |                             | Levene's Test for Equality of Variances |      | t-test for Equality of Means |        |                 |                 |                       |                                           |        |
|                          |                             | F                                       | Sig. | t                            | df     | Sig. (2-tailed) | Mean Difference | Std. Error Difference | 95% Confidence Interval of the Difference |        |
|                          |                             |                                         |      |                              |        |                 |                 |                       | Lower                                     | Upper  |
| Per_Fin_min_Base         | Equal variances assumed     | .022                                    | .883 | .126                         | 70     | .900            | .01256          | .09956                | -.18600                                   | .21112 |
|                          | Equal variances not assumed |                                         |      | .123                         | 56.822 | .902            | .01256          | .10200                | -.19172                                   | .21683 |

Table 80. Independent samples t-test of Gender on Per\_Fin\_min\_Base

### 13. Questionnaire

Structured questionnaire on the experience of a tutoring robot (English translated from the Cantonese). Variable names (between brackets) were left out from the original questionnaire.

What did the robot look like to you? The more circles you fill in, the more you agree with the statement. Only one circle filled in means you don't agree at all, all circles filled in means you totally agree.

機器人對你來說像什麼呢？你填滿越多的圈圈代表你越認同對應的陳述。只填滿一個圈圈代表你完全不同意，如果所有圓圈都被你填滿了，代表你十分認同這個陳述。

#### [Representation]

The robot looked like a...

機器人看起來像...

1. Machine

機器

☐ ☐ ☐ ☐ ☐ ☐

2. Human

人類

☐ ☐ ☐ ☐ ☐ ☐

3. Animal

動物

☐ ☐ ☐ ☐ ☐ ☐

**[Social Role]**

What did the robot feel like to you? To me the robot felt like a...

(choose one answer that suits you best)

你怎麼看待機器人呢？對我來說，機器人像一個...

(選擇一個最接近你想法的)

4. Friend

朋友

☐ ☐ ☐ ☐ ☐ ☐

5. Classmate

同學

☐ ☐ ☐ ☐ ☐ ☐

6. Teacher

老師

☐ ☐ ☐ ☐ ☐ ☐

7. Acquaintance

熟人

☐ ☐ ☐ ☐ ☐ ☐

8. Stranger

陌生人

☐ ☐ ☐ ☐ ☐ ☐

9. Machine

機器

☐ ☐ ☐ ☐ ☐ ☐

10. Other...

其它

☐ ☐ ☐ ☐ ☐ ☐

How did you feel about your connection with the robot? The more circles you fill in the more you agree with the statement.

你覺得你跟機器人的關係怎麼樣呢？越多的圈圈代表你越認同對應的陳述。

**[Engagement]**

The robot...

這個機器人

11. I like the robot

我喜欢機器人

☐ ☐ ☐ ☐ ☐ ☐

12. The robot gave me a good feeling

它讓我感覺很好

☐ ☐ ☐ ☐ ☐ ☐

13. I felt uncomfortable with the robot

機器人令我感觉不舒服

☐ ☐ ☐ ☐ ☐ ☐

14. It was fun with the robot

機器人好好玩

☐ ☐ ☐ ☐ ☐ ☐

15. I dislike the robot

我不喜欢機器人

☐ ☐ ☐ ☐ ☐ ☐

**[Bonding]**

16. I felt a bond with the robot

我覺得和機器人有連結

☐ ☐ ☐ ☐ ☐ ☐

17. I felt like the robot was interested in me

我覺得機器人对我有興趣

☐ ☐ ☐ ☐ ☐ ☐

18. I felt connected to the robot

我对機器人有連結的感觉

☐ ☐ ☐ ☐ ☐ ☐

19. I want to be friends with the robot

我想和機器人做朋友

☐ ☐ ☐ ☐ ☐ ☐

20. The robot understands me

機器人明白我

☐ ☐ ☐ ☐ ☐ ☐

What did you think about your interaction with the robot? The more circles you fill in the more you agree with the statement.

你覺得你跟機器人的互動怎麼樣？越多的圓圈代表你越同意。

**[Anthropomorphism]**

21. To me the robot was a machine

我覺得機器人只是一个物件

☐ ☐ ☐ ☐ ☐ ☐

22. It felt just like a human was talking to me

我覺得好像一个人和我说话

☐ ☐ ☐ ☐ ☐ ☐

23. I reacted to the robot just as I react to a human

我跟機器人對話犹如和人类对话一样

☐ ☐ ☐ ☐ ☐ ☐

24. It differed from a human-like interaction

和機器人交流和人类不一样

☐ ☐ ☐ ☐ ☐ ☐

**[Perceived Realism]**

25. The robot resembled a real-life creature

機器人犹如活物一样

☐ ☐ ☐ ☐ ☐ ☐

26. It was just like real to me

機器人好真实

☐ ☐ ☐ ☐ ☐ ☐

27. The robot was fabricated

機器人好做作

☐ ☐ ☐ ☐ ☐ ☐

28. It felt just like a real conversation

和機器人對話好真實

☐ ☐ ☐ ☐ ☐ ☐

**[Relevance]**

29. The robot was important to do my exercises

機器人對我學習很重要

☐ ☐ ☐ ☐ ☐ ☐

30. The robot helped me to practice the multiplication tables

機器人幫到我練習乘法表

☐ ☐ ☐ ☐ ☐ ☐

31. The robot was useless for rehearsing the multiplication tables

機器人幫不到我練習乘法表

☐ ☐ ☐ ☐ ☐ ☐

32. The robot is what I need to practice the multiplication tables

我需要機器人才能練習乘法表

☐ ☐ ☐ ☐ ☐ ☐

**[Perceived Affordances]**

33. I understood the task with the robot immediately

我明白機器人的指示

☐ ☐ ☐ ☐ ☐ ☐

34. The robot was clear in its instructions

機器人的指示好清晰

☐ ☐ ☐ ☐ ☐ ☐

35. It took me a while before I understood what to do with the robot

我需要一點時間明白機器人的操作

☐ ☐ ☐ ☐ ☐ ☐

36. I puzzled to understand how to work with the robot

我對於機器人的用法有點疑問

☐ ☐ ☐ ☐ ☐ ☐

**[Use Intentions]**

For the next time practicing multiplications, I would....

下次練習乘法表的時候，我會。。

37. use the robot again

再次用機器人

☐ ☐ ☐ ☐ ☐ ☐

38. use another tool, like a tablet

使用其他學習工具

☐ ☐ ☐ ☐ ☐ ☐

39. want this robot to help me again

想要機器人再次幫我

☐ ☐ ☐ ☐ ☐ ☐

Then, some final questions

*The more circles you fill in the more you agree with the statement.*

最後幾個問題，圈得越多代表你越同意。

**[Novelty]**

40. I played with robots before

我有玩过機器人

☐ ☐ ☐ ☐ ☐ ☐
**[Aesthetics]**

The robot looked...

機器人的外表。。

41. Beautiful

很漂亮

☐ ☐ ☐ ☐ ☐ ☐
**[Demographics]**

42. I am a...

我是一個

○ Boy 男孩

○ Girl 女孩

43. How old are you 請問你幾歲?

\_\_\_\_\_

**Thank you for all the help. See you next time!!**

謝謝你的幫助。期待我們下次再見。

**References**

- Beckmann, E., & Minnaert, A. (2018). Non-cognitive characteristics of Advanced students with learning disabilities: an in-depth systematic review. *Frontiers in Psychology*, 9, 504. doi: 10.3389/fpsyg.2018.00504
- Konijn, E. A., & Hoorn, J. F. (2017). Parasocial Interaction and Beyond: Media Personae and Affective Bonding. *The International Encyclopedia of Media Effects*, 1-25.
- Paauwe, R. A., Hoorn, J. F., Konijn, E. A., & Keyson, D. V. (2015). Designing robot embodiments for social interaction: Affordances topple realism and aesthetics. *International Journal of Social Robotics*, 7(5), 697-708.  
Available from <http://link.springer.com/article/10.1007/s12369-015-0301-3>
- Pisapia, J., Schlesinger, J., & Parks, A. (1993). Learning Technologies in the Classroom: Review of Literature.
